1     **Disentangling the effects of genetic architecture, mutational bias**  
2                     **and selection on evolutionary forecasting**

3  
4  
5     Peter A. Lind<sup>1,2</sup>, Eric Libby<sup>1,3,4</sup>, Jenny Herzog<sup>1</sup> and Paul B. Rainey<sup>1,5,6</sup>

6  
7     <sup>1</sup>New Zealand Institute for Advanced Study, Massey University at Albany, Auckland,  
8     0745, New Zealand.

9     <sup>2</sup>Department of Molecular Biology, Umeå University, SE-901 87 Umeå, Sweden.

10    <sup>3</sup>Santa Fe Institute, Santa Fe, New Mexico, United States of America.

11    <sup>4</sup>Department of Mathematics, Umeå University, SE-901 87 Umeå, Sweden.

12    <sup>5</sup>Department of Microbial Population Biology, Max Planck Institute for Evolutionary  
13    Biology, Plön 24306, Germany.

14    <sup>6</sup>Ecole Supérieure de Physique et de Chimie Industrielles de la Ville de Paris (ESPCI  
15    Paris-Tech), CNRS UMR 8231, PSL Research University, 75231 Paris, France.

16  
17

18    Correspondence and requests for materials should be addressed to  
19    Peter A. Lind, Dept. Molecular Biology, Umeå University, SE-901 87 Umeå,  
20    Sweden.

21    email: peter.lind@umu.se

22    Keywords: *Pseudomonas fluorescens*, experimental evolution, genetic architecture,  
23    wrinkly spreader, c-di-GMP, evolutionary forecasting

24

25    Short running title: complexities of the genotype-to-phenotype map

26

27    Impact statement: Using a combination of genetics, experimental evolution and  
28    mathematical modelling this work defines information necessary to predict the  
29    outcome of short-term adaptive evolution

30

## 31 **Abstract**

32 Predicting evolutionary change poses numerous challenges. Here we take advantage  
33 of the model bacterium *Pseudomonas fluorescens* in which the genotype-to-  
34 phenotype map determining evolution of the adaptive “wrinkly spreader” (WS) type  
35 is known. We present mathematical descriptions of three necessary regulatory  
36 pathways and use these to predict both the routes that evolution follows and the  
37 expected mutational targets. To test predictions, mutation rates and targets were  
38 determined for each pathway. Unanticipated mutational hotspots caused data to  
39 depart from predictions but the new data were readily incorporated into refined  
40 models. A mismatch was observed between the spectra of WS-causing mutations  
41 obtained with and without selection due to low fitness of previously undetected WS-  
42 causing mutations. Our findings contribute toward the development of mechanistic  
43 models for forecasting evolution, highlight current limitations, and draw attention to  
44 challenges in predicting locus-specific mutational biases and fitness effects.

## 45 **Introduction**

46 Adaptation requires the realization of beneficial mutations. As self-evident as this  
47 maybe, predicting the occurrence of beneficial mutations and their trajectories to  
48 improved fitness is fraught with challenges (Lässig, et al. 2017). Nonetheless  
49 progress has been made for phenotypically diverse asexual populations subject to  
50 strong selection. Effective approaches have drawn upon densely sampled sequence  
51 data and equilibrium models of molecular evolution to predict amino acid preferences  
52 at specific loci (Luksza and Lassig 2014). Predictive strategies have also been  
53 developed based on selection inferred from the shape of coalescent trees (Neher, et al.  
54 2014). In both instances the models are coarse-grained and sidestep specific  
55 molecular and mutational details.

56

57 There is reason to by-pass molecular details: mutation, being a stochastic process,  
58 means that for the most part details are likely to be idiosyncratic and unpredictable.  
59 But an increasing number of investigations give reason to think otherwise – that  
60 adaptive molecular evolution might follow rules (Pigliucci 2010; Stern 2013; Laland,  
61 et al. 2015). This is particularly apparent in studies of parallel molecular evolution  
62 (Colosimo, et al. 2005; Woods, et al. 2006; Ostrowski, et al. 2008; Flowers, et al.  
63 2009; Meyer, et al. 2012; Tenaillon, et al. 2012; Zhen, et al. 2012; Herron and  
64 Doebeli 2013; Galen, et al. 2015; Bailey, et al. 2017; Kram, et al. 2017; Stoltzfus and  
65 McCandlish 2017).

66

67 A standard starting position for predicting adaptive evolution recognises the  
68 importance of population genetic parameters including mutation rate, generation time,  
69 population size, selection and more recently information on the distribution of  
70 beneficial fitness effects, but these factors alone leave unconsidered mechanistic  
71 details that arise from the genotype-to-phenotype map and from mutational biases.

72 To what extent do these details matter?

73

74 Mutations arise randomly with respect to utility, but genetic architecture can influence  
75 the translation of mutation into phenotypic variation: the likelihood that a given  
76 mutation generates phenotypic effects depends on the genotype-to-phenotype map  
77 (Alberch 1991; Gompel and Prud'homme 2009; Stern and Orgogozo 2009; Rainey, et

78 al. 2017). The function of gene products and their regulatory interactions thus  
79 provides information on likely mutational targets underpinning particular phenotypes.  
80 This is evident when considering a hypothetical structural determinant subject to both  
81 positive and negative regulation and whose over-expression generates a given  
82 adaptive phenotype. Assuming a uniform distribution of mutational events, mutations  
83 in the negative regulator (and not the positive activator) will be the primary cause of  
84 the adaptive phenotype. This follows from the fact that loss-of-function mutations are  
85 more common than gain-of-function mutations. Indeed, an emerging rule indicates  
86 that phenotypes determined by genetic pathways that are themselves subject to  
87 negative regulation are most likely to arise by loss-of-function mutations in negative  
88 regulatory components (McDonald, et al. 2009; Tenaillon, et al. 2012; Lind, et al.  
89 2015; Fraebel, et al. 2017).

90

91 Mutation is not equally likely at each nucleotide of a given genome (Lind and  
92 Andersson 2008; Lynch 2010; Seier, et al. 2011; Foster, et al. 2015; Reijns, et al.  
93 2015; Sankar, et al. 2016; Stoltzfus and McCandlish 2017). Numerous instances of  
94 mutational bias have been reported. Prime examples are simple sequence repeats  
95 such as homopolymeric nucleotide tracts or di-, tri- and tetrameric repeats that mutate  
96 at high frequency via slipped strand mispairing (Levinson and Gutman 1987). These  
97 readily identifiable sequences define contingency loci in obligate human pathogens  
98 and commensals (Moxon, et al. 1994) and are widespread in eukaryotic genomes  
99 (Tautz and Renz 1984). The behaviour of contingency loci can be further modulated  
100 by defects in components of methyl-directed mismatch repair systems (Richardson  
101 and Stojiljkovic 2001; Martin, et al. 2004; Hammerschmidt, et al. 2014; Heilbron, et  
102 al. 2014).

103

104 Certain palindromic structures also lead to mutational bias (Viswanathan, et al. 2000;  
105 Lovett 2004) and promote amplification events including that increase mutational  
106 target size (Roth, et al. 1996; Kugelberg, et al. 2010; Reams and Roth 2015),  
107 transition-transversion bias (Stoltzfus and McCandlish 2017) and elevated mutation  
108 rates at CpG sites (Galen, et al. 2015) can also skew the distributions of mutational  
109 effects. Further bias arises from the chromosomal neighbourhood of genes under  
110 selection (Steinrueck and Guet 2017), the location of genes with regard to interactions  
111 with DNA replication/transcription machineries (Sankar, et al. 2016), and

112 environmental factors that affect not only mutation rate but also the spectra of  
113 mutational events (Krasovec, et al. 2017; Maharjan and Ferenci 2017; Shewaramani,  
114 et al. 2017).

115

116 Beyond the genotype-to-phenotype map and mutational biases, predicting adaptive  
117 evolution requires ability to know *a priori* the fitness effects of specific mutations. At  
118 the present time there is much theoretical and empirical interest in the distribution of  
119 fitness effects (DFE) (Eyre-Walker and Keightley 2007) — and particularly the DFE  
120 of beneficial mutations (Orr 2005) — because of implications for predicting the rate  
121 of adaption and likelihood of parallel evolution (de Visser and Krug 2014), but  
122 knowledge of the shape of the distribution is insufficient to connect specific mutations  
123 to their specific effects, or to their likelihood of occurrence. Such connections require  
124 a means of knowing the connection between mutations and their environment-specific  
125 fitness effects. This is tall order. A starting point is to understand the relationship  
126 between all possible mutational routes to a particular phenotype and the set that are  
127 realised by selection.

128

129 Here we take a bacterial system in which the genetic pathways underpinning  
130 evolution of the adaptive “wrinkly spreader” (WS) type are known and use this to  
131 explore the current limits on evolutionary forecasting. *Pseudomonas fluorescens*  
132 SBW25 growing in static broth microcosms rapidly depletes available oxygen  
133 establishing selective conditions that favour mutants able to colonise the air-liquid  
134 interface. The most successful mutant-class encompasses the WS types (Ferguson, et  
135 al. 2013; Lind, et al. 2017b). These types arise from mutational activation of  
136 diguanylate cyclases (DGCs), cause over-production of the second messenger c-di-  
137 GMP (Goymer, et al. 2006; McDonald, et al. 2009), over-production of an acetylated  
138 cellulose polymer (Spiers, et al. 2002; Spiers, et al. 2003) and ultimately formation of  
139 a self-supporting microbial mat (Figure 1A).

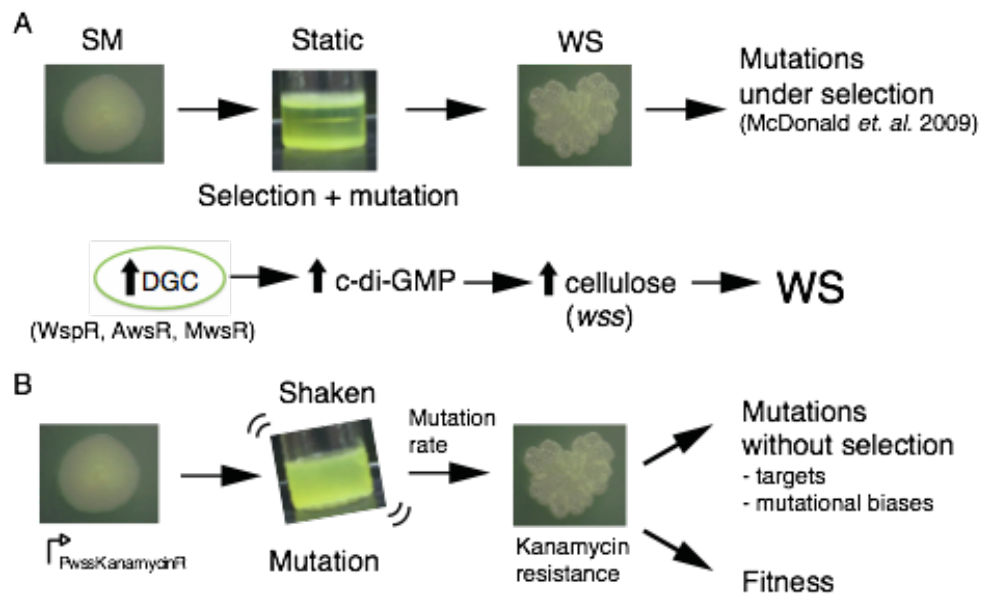

140

141 **Figure 1. The *Pseudomonas fluorescens* SBW25 wrinkly spreader model. (A)**

142 Selection for access to oxygen allows wrinkly spreader (WS) mutants to invade the

143 ancestral smooth (SM) population in static microcosms. WS mutants form a mat at

144 the air-liquid interface through increased expression of the main structural

145 component, cellulose, encoded by the *wss* operon. Expression of cellulose is

146 controlled by the second messenger c-di-GMP, which is produced by diguanylate

147 cyclases (DGCs). Mutations in the *wsp*, *aws* and *mws* operons that activate their

148 respective DGCs (WspR, AwsR, MwsR) are the primary mutational pathways to WS.

149 **(B)** When a reporter construct connecting expression of the *wss* operon to resistance

150 to kanamycin is used under shaken non-selective conditions, WS mutants can be

151 isolated without the biasing influence of natural selection. This allows estimation of

152 the mutation rate to WS and an unbiased spectrum of mutations defining the

153 mutational target. Fitness can then be assayed in competition with a common

154 reference strain and the influence of fitness, mutational target size and mutational

155 biases on the outcome of evolution can be evaluated.

156

157 McDonald *et al.* (McDonald, et al. 2009) showed that each time the tape of WS

158 evolution is re-run mutations generating the adaptive type arise in one of three DGC-

159 encoding pathways (Wsp, Aws, or Mws) (Figure 1A). Subsequent work revealed that

160 when these three pathways are eliminated from the ancestral type that evolution

161 proceeds along multiple new pathways (Lind, et al. 2015). Preferential usage of Wsp,

162 Aws and Mws pathways stems from the fact that they are subject to negative

163 regulation and thus, relative to pathways subject to positive regulation, or requiring  
164 promoter-activating mutations, gene fusion events, or other rare mutations, present a  
165 large mutational target.

166

167 Given repeatability of WS evolution, knowledge of the Wsp/Aws/Mws pathways,  
168 plus genetic tools for mechanistic investigation — including capacity to obtain WS  
169 mutants in the absence of selection — the WS system offers a rare opportunity to  
170 explore the feasibility of developing bottom-up strategies for evolutionary  
171 forecasting. Our findings show that mechanistic-level predictions are possible, but  
172 also draw attention to challenges that stem from current inability to *a priori* predict  
173 locus specific mutational biases and environment-specific fitness effects.

174

## 175 **Results**

### 176 **Obtaining an unbiased measure of pathway-specific mutation rates to WS**

177 Knowledge of the rate at which mutation generates WS types via each of the Wsp,  
178 Aws and Mws pathways — unbiased by the effects of selection — provides a  
179 benchmark against which the predictive power of null models can be appraised. To  
180 achieve such measures we firstly constructed a set of genotypes containing just one of  
181 the three focal pathways: PBR721 carries the Wsp pathway but is devoid of Aws and  
182 Mws, PBR713 carries the Aws pathway but is devoid of Wsp and Mws, while  
183 PBR712 harbours the Mws pathway but is devoid of Wsp and Aws. Into each of  
184 these genotypes a promoterless kanamycin resistance gene was incorporated  
185 immediately downstream of the promoter of the cellulose-encoding Wss operon and  
186 fused to an otherwise unaffected Wss operon (Figure 1B).

187

188 In the ancestral SM genotype the cellulose promoter is inactive in shaken King's  
189 Medium B (KB) broth and thus the strain is sensitive to kanamycin. When a WS-  
190 causing mutation occurs the *wss* promoter becomes active resulting in a kanamycin-  
191 resistant WS type (Fukami, et al. 2007; McDonald, et al. 2011). Individual growth of  
192 this set of three genotypes in shaken KB, combined with plating to detect kanamycin-  
193 resistant mutants, makes possible a fluctuation assay (Luria and Delbruck 1943; Hall,  
194 et al. 2009) from which a direct measure of the rate at which WS mutants arise can be  
195 obtained. Importantly, because WS types are maladapted in shaken broth culture, the

196 screen for kanamycin-resistant clones allows the pathway-specific mutation rate to  
197 WS to be obtained without the biasing effects of selection for growth at the air-liquid  
198 interface (Figure 1B). The results are shown in Figure 2.

199

200 The mutation rate was highest for the Aws pathway ( $6.5 \times 10^{-9}$ ); approximately  
201 double that of Wsp ( $3.7 \times 10^{-9}$ ) and an order of magnitude higher than that of the Mws  
202 pathway ( $0.74 \times 10^{-9}$ ) (Figure 2). The rate at which WS mutants arose from the  
203 ancestral genotype in which the three pathways are intact ( $11.2 \times 10^{-9}$ ) was  
204 approximately the sum of the rates for the three pathways ( $11.0 \times 10^{-9}$ ) confirming  
205 that the Wsp, Aws and Mws pathways are the primary routes by which WS types  
206 evolve (Lind, et al. 2015). That the Aws pathway has the greatest capacity to  
207 generate WS is surprising given the smaller target size (three genes compared to  
208 seven genes in the Wsp pathway).

209

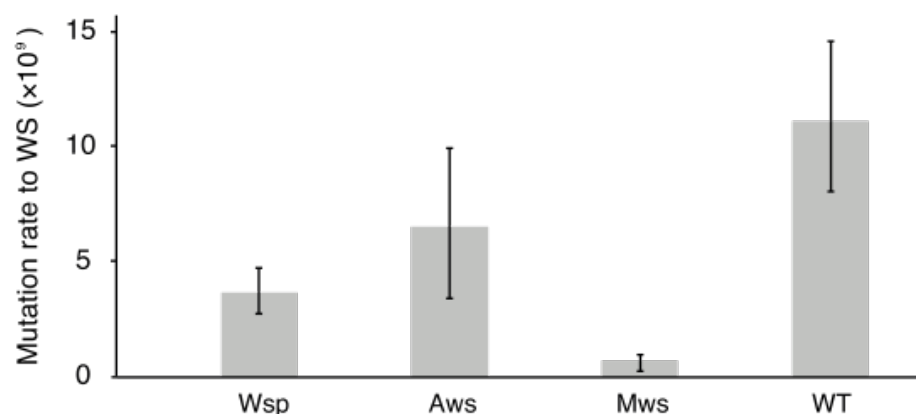

210

211 **Figure 2. Mutation rates to WS.** Fluctuation tests were used to estimate the mutation  
212 rate to WS for the three common mutational pathways to WS. Error bars represent  
213 mean and 95% confidence intervals.

214

### 215 **Modelling the genotype-to-phenotype map underpinning WS evolution**

216 Much is known about the function and interactions among components of each of the  
217 three focal pathways. This knowledge allows development of models that capture the  
218 dynamic nature of each pathway and thus allow predictions as to the likelihood that  
219 evolution will precede via each of the three pathways. An unresolved issue is the  
220 extent to which these models match experimental findings. Following a brief  
221 description of each pathway we describe the models.

222



223 The 8.4 kb Wsp pathway is a chemotaxis-like system (Goymer, et al. 2006; Guvener  
224 and Harwood 2007; Romling, et al. 2013; Micali and Endres 2016) comprised of  
225 seven genes with the first six genes (*wspA-wspF*) being transcribed as a single unit  
226 and the last (*wspR* from its own promoter (Bantinaki, et al. 2007). WspA  
227 (PFLU1219) is a methyl-accepting chemotaxis (MCP) protein that forms a complex  
228 with the CheW-like scaffolding proteins WspB (PFLU1220) and WspD (PFLU1222).  
229 WspA senses environmental stimuli and transmits the information via conformational  
230 changes in the WspA/WspB/WspD complex to effect activity of WspE (PFLU1223),  
231 a CheA/Y hybrid histidine kinase response regulator. WspE activates both the WspR  
232 (PFLU1225) diguanylate cyclase (DGC) and the CheB-like WspF methylesterase  
233 WspF (PFLU1224) following transference of an active phosphoryl group. The  
234 activity of WspA is modulated by methylation: the constitutively active CheR-like  
235 methyltransferase WspC (PFLU1221) transfers methyl groups to conserved glutamine  
236 residues on WspA while when phosphorylated, WspF serves to remove these groups.  
237 WS mutants are known to arise by mutations in the WspF negative regulator and also  
238 in the WspE kinase (McDonald, et al. 2009). In vitro manipulations of WspR that  
239 abolish repression of the DGC domain by the response regulator domain are known,  
240 but have never been observed to occur in experimental populations (Goymer, et al.  
241 2006).

242

243 The 2.3 kb *aws* operon contains three genes transcribed from a single promoter  
244 (*awsXRO*). Homologous genes in *Pseudomonas aeruginosa* (*yfiRNB*, PA1121-1119)  
245 have been characterised in detail (Malone, et al. 2010; Malone, et al. 2012; Xu, et al.  
246 2016). The outer membrane lipoprotein AwsO (PFLU5209) has an OmpA domain, a  
247 signal peptide and binds to peptidoglycan. AwsO is thought to be the sensor whose  
248 activity is modulated in response to envelope stress (Malone, et al. 2012). AwsO  
249 sequesters the periplasmic protein AwsX (PFLU5211) at the outer membrane. AwsX  
250 functions as a negative regulator of the DGC AwsR (PFLU5210) in the inner  
251 membrane. Both increased binding of AwsX to AwsO or loss of negative regulation  
252 by inactivation of the interaction between AwsX and AwsR can lead to WS  
253 (McDonald, et al. 2009; Malone, et al. 2010; Malone, et al. 2012).

254

255 The 3.9 kb *mwsR* gene (PFLU5329, known as *morA* (PA4601) in *Pseudomonas*  
256 *aeruginosa*), encodes a predicted membrane protein with both a DGC domain that

257 produces c-di-GMP and a phosphodiesterase (PDE) domain that degrades c-di-GMP.  
 258 Little is known of the molecular details determining its function, but both catalytic  
 259 domains appear to be active (Phippen, et al. 2014). Deletion of the PDE domain  
 260 results in a WS phenotype with activity being dependent on a functional DGC domain  
 261 (McDonald, et al. 2009).  
 262  
 263 If the specific effect of changing each nucleotide (and sets of nucleotides) was known  
 264 then models for each pathway would not be required, but such knowledge does not  
 265 exist. We therefore take a simplifying approach in which attention focuses on the  
 266 interactions between components that correspond to reactions whose rate can either  
 267 increase, decrease, or remain unaffected, depending on mutations in the component  
 268 parts. Such mutations increase the reaction (enabling mutations), decrease the  
 269 reaction (disabling mutations) or leave them unaffected. The components and  
 270 interactions are shown in Figure 3. Figure 3 along with figure supplements 1 to 3  
 271 describe the molecular reactions and the associated differential equations governing  
 272 the dynamics of each pathway. An advantage of this simplifying approach is that  
 273 changes to a reaction may encompass mutations in more than a single component.  
 274 For example, mutations in either WspE or WspR may increase reaction  $r_5$  of the Wsp  
 275 pathway (Figure 3A).

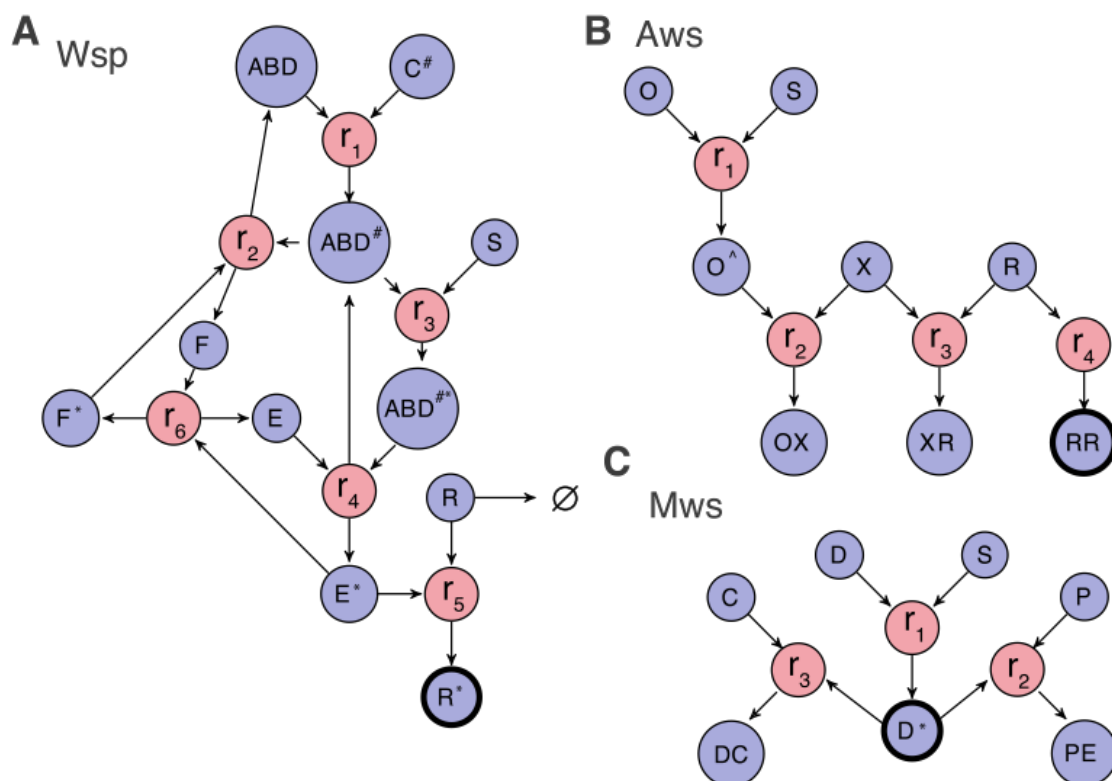

276

277 **Figure 3. Modeling of WS. (A)** Model of the Wsp pathway. R\* represents the  
278 activated form of WspR and increase of R\* leads to a WS phenotype **(B)** Model for  
279 the Aws pathway. RR represents the activated form of AwsR and increase of RR  
280 leads to a WS phenotype. **(C)** Model of the Mws Pathway. D\* represents the activated  
281 form of the DGC domain. Our functional model places the PDE domain as a negative  
282 regulator of DGC activity. Details of the molecular networks are found in Figure 3  
283 figure supplement 1 for Wsp, Figure 3 figure supplement 2 for Aws and Figure 3  
284 figure supplement 3 for Mws. In the simple null models all genetic components are  
285 the same size, but information of mutational target size can readily be accommodated  
286 in the model by changing the individual probabilities of disabling and enabling  
287 mutations. The benefit of doing so might however be small if not combined with  
288 detailed data on mutation rates (see Discussion).

289

290 Equipped with the set of mathematical descriptions it is possible to consider  
291 combinations of enabling, disabling, and no effect changes to reaction rates and  
292 determine the likelihood that a WS type is generated. For the Wsp system this  
293 amounts to  $3^6$  or 729 combinations. An example of one set of the possible mutations  
294 ( $m_i$ ) in Wsp is 1, -1, 0, 0, 0, 0 (an increase in  $r_1$ , a decrease in  $r_2$ , but no change in  $r_3$ ,  
295  $r_4$ ,  $r_5$ , or  $r_6$  (Figure 3A)).

296

### 297 **Predicting the pathways that evolution follows and genetic targets**

298 To determine whether mutations producing WS occur more often in Wsp compared to  
299 Aws or Mws pathways, we adopt a Bayesian approach in which the probability that a  
300 particular pathway is used is decomposed into two terms: the probability that a  
301 particular set of mutations ( $m_i$ ) occurs in Wsp (or Aws, or Mws) represented as  $P(m_i$   
302  $\in Wsp)$  and the probability that those mutations give rise to a wrinkly spreader  
303 represented as  $P(WS | m_i \in Wsp)$  (or Aws, or Mws).

304

$$305 P(WS \cap m \cap Wsp) = \sum_i P(WS | m_i \in Wsp) P(m_i \in Wsp) \quad (1)$$

306

307 To estimate  $P(m_i \in Wsp)$  we assume fixed probabilities of enabling and disabling  
308 mutations and compute the product. Thus, the probability of  $m_i = 1, -1, 0, 0, 0, 0$  is  
309  $p_e p_d (1 - p_e - p_d)^4$ , where  $p_e$  is the probability of a mutation with an enabling effect

310 and  $p_d$  is the probability of a mutation with a disabling effect. Recognising the value  
311 of accommodating the possibility of localised mutational bias we note that  $p_e$  and  $p_d$   
312 can be adjusted for the affected reactants. The second term,  $P(WS | m_i \in W_{sp})$ ,  
313 requires knowing both how gene products interact and how these interactions result in  
314 a phenotype. This information is estimated based on the pathway dynamics  
315 represented in Figure 3 and Figure 3 – figure supplement 1 by repeated sampling from  
316 the space of all possible reaction rates, initial concentrations, and magnitude of effects  
317 (see Materials and Methods).

318

319 The results of simulations are shown in Figure 4. Figure 4A shows that the Wsp  
320 pathway is predicted to be the target of mutation 1.3 - 2.1 times more often than the  
321 Aws pathway while Figure 4B shows that the Mws pathway is predicted to be the  
322 target of mutation 0.7 - 1.0 times less often than the Aws pathway. While these results  
323 agree with the experimental data showing Mws to be least likely pathway to be  
324 followed, the predictions are at odds with the mutation rate data showing WS types to  
325 be twice as likely to arise from mutation in Aws, versus Wsp. The causes of this  
326 discrepancy are described in the following section.

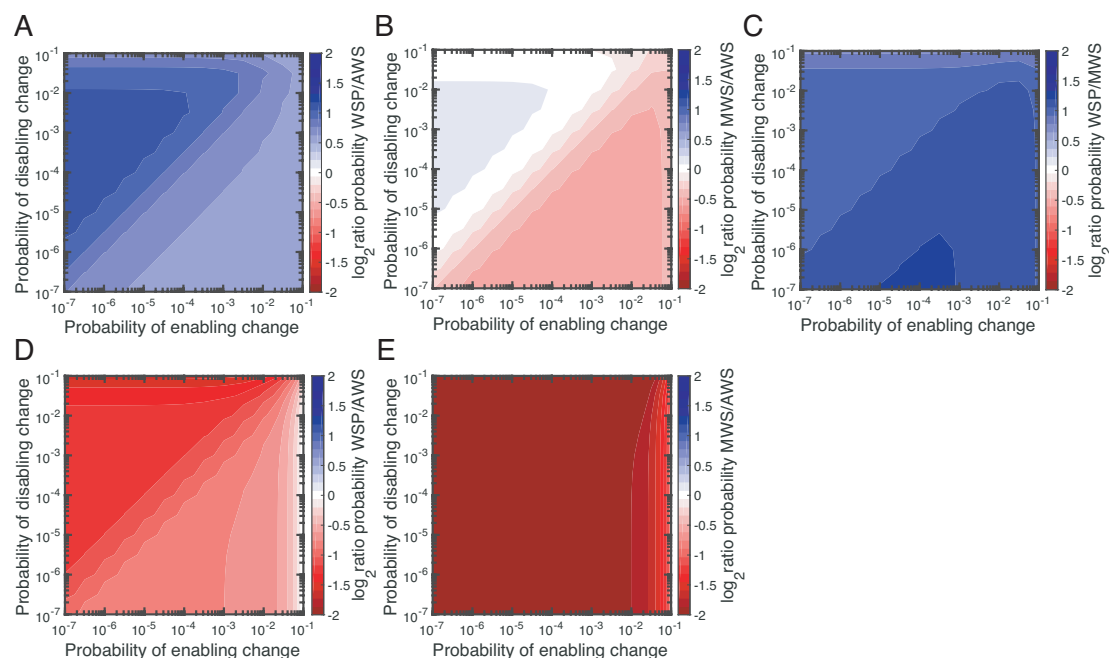

327

328 **Figure 4. Modelling of the probability of using the Wsp, Aws and Mws pathways**

329 **(A) Probability of Wsp relative to Aws.** Equal mutation rates for all components.

330 **(B) Probability of Mws relative to Aws.** Equal mutation rates for all components.

331 **(C) Probability of Mws relative to Wsp.** Equal mutation rates for all  
332 components.**(D) Probability of Wsp relative to Aws with the mutational hotspot**  
333 **in AwsX included.** Based on the mutational data a hot spot for Aws is included in the  
334 models that increase the mutation rate by a factor five for both enabling and disabling  
335 mutations. **(E) Probability of Mws relative to Aws with the mutational hotspot in**  
336 **AwsX included.** The relative contributions of individual reactions rates are available  
337 in Figure 4 - figure supplement 1 for Wsp and Figure 4 - figure supplement 1 for  
338 Aws.

339

340 In addition to predicting the preferred mutational pathways to produce a WS, the  
341 Bayesian approach also predicts genes likely to be affected by mutation (Figure 4  
342 figure supplement 1 and 2). Predictions as to specific genetic targets come from  
343 appraisal of the relative importance of each reaction in terms of generating a wrinkly  
344 spreader (Figure 4 – supplement 1 and 2). While it is recognised that a majority of  
345 WS mutations arise from mutations in negative regulators of DGC activity, such as  
346 WspF and AwsX (McDonald, et al. 2009; Lind, et al. 2015), further predictions are  
347 possible based on impacts of alterations in gene function on reaction rates. For  
348 example, with reference to the Wsp pathway (Figure 4 – figure supplement 1), there  
349 are two reactions ( $r_2$  and  $r_6$ ) that affect WspF function:  $r_2$  describes the rate of removal  
350 of methyl groups from the signalling complex and  $r_6$  the rate at which WspF is  
351 activated by transfer of active phosphoric groups from the WspE kinase. Loss-of-  
352 function (disabling) mutations being much more common than gain-of-function  
353 (enabling) mutations means that both WspF and WspE are likely targets. The null  
354 model predicts that in the area of parameter space in which Wsp is most likely  
355 compared to Aws, 45% of the time WS will be generated when the second reaction,  
356  $r_2$ , is altered (Figure 4 – figure supplement 1). The same is true for reaction  $r_6$ . Thus  
357 the presence of a negative regulator is predicted to extend the mutational target size  
358 well beyond the gene itself. This is also true for Aws, where  $r_3$  is the main contributor  
359 to the WS phenotype in the case where disabling change is more common than  
360 enabling change. Here mutations are predicted not only in the negative regulator  
361 AwsX, but also in the interacting region of the DGC AwsR (Figure 4 – figure  
362 supplement 2).

363

364 Loss-of-function mutations in negative regulators and their interacting partners are  
365 not the only predicted targets. For Wsp  $r_1$ ,  $r_3$ ,  $r_4$ , and  $r_5$  are altered approximately 5%  
366 of the time in the parameter region where disabling mutations are more common than  
367 enabling mutations, but contribute more when the rate of enabling mutations is  
368 increased (Figure 4 – figure supplement 1). Enabling mutations based on the model  
369 are likely to be found in WspC increasing  $r_1$ , WspABD increasing  $r_3$ , WspABD/WspE  
370 increasing  $r_4$  and WspR increasing  $r_5$  (Figure 2A). For Aws, enabling mutations are  
371 predicted to increase reaction  $r_1$  by mutations causing constitutive activation of AwsO,  
372  $r_2$  increasing binding of AwsO and AwsX and  $r_4$  increasing formation of the active  
373 AwsR dimer (Figure 3B, Figure 4 – figure supplement 2).

374

375 In summary, high rates of WS mutations are predicted for *wspF*, *wspE*, *wspA*, *awsX*  
376 and *awsR* with lower rates for *wspC*, *wspR* and *awsO*. Several of these predictions sit  
377 in accord with previous experimental observations, however, notable are predictions  
378 that evolution might also target *wspA* and *wspR*, two genes that have not previously  
379 been identified as mutational causes of WS types (McDonald, et al. 2009).

380

### 381 **Analysis of mutants reveals sources of mutational bias**

382 There are several reasons why predictions from the models might be out of kilter with  
383 experimental data on mutation rates. We firstly looked to the distribution of WS  
384 generating mutations among the 109 mutants collected during the course of the  
385 fluctuation assays. Of the 109 mutants, 105 harboured a mutation in *wsp* (46  
386 mutants), *aws* (41 mutants) or *mws* (18 mutants) (Figure 5A, Figure 5 – source data  
387 1). The remaining four had mutations in previously described rare pathways  
388 (PFLU0085, PFLU0183), again confirming that these non-focal pathways produce  
389 just a fraction of the total set of WS mutants (Lind, et al. 2015).

390

391 The distribution of mutations for each of the three pathways is indicative of bias. As  
392 shown in Figure 5B, almost 29% of all WS-causing mutations (adjusted for  
393 differences in mutation rates between the three pathways) were due to an identical  
394 base pair in-frame deletion in *awsX* ( $\Delta$ t229-g261,  $\Delta$ Y77-Q87), while a further 13 %  
395 were due to an identical mutation (79 a->c, T27P) in *awsR*. At least 41 different  
396 mutations in Aws can lead to WS: if mutation rates were equal for these sites the  
397 probability of observing 20 identical mutations would be extremely small. In fact 10

398 million random samplings from the observed distribution of mutations failed to  
399 recover this bias. While the Wsp pathway also contains sites that were mutated more  
400 than once (six positions were mutated twice, one site three times and one five times),  
401 sources of mutational bias in Wsp were less evident than in Aws (Figure 5B).

402

403 The mathematical models presented above assumed no mutational bias thus the lack  
404 of fit between mutation rate data and predictions from the models. Nonetheless,  
405 changing specific reaction rates within the models readily incorporates such  
406 knowledge. For example, the mutational hotspot in *awsX* affects reactions  $r_2$  and  $r_3$  in  
407 the Aws differential equation system (Figure 3B, Figure 3 – figure supplement 2).  
408 The effect of a five-fold change in the probability of enabling/disabling change in  
409 these reactions leads to the prediction that the Aws pathway is more likely to generate  
410 WS types than Wsp for most probability values (see Figure 4D). The only area of  
411 parameter space in which evolution is more likely to utilise the Wsp pathway is for  
412 rare mutations that have a high probability of enabling change ( $\gg 10^{-2}$ ). One  
413 interesting consequence is that it changes the phase-space over which evolution of  
414 WS via mutations in the Wsp pathway is more likely with respect to the Aws  
415 pathway. In Figure 4A, evolution is most likely to proceed via the Wsp pathway when  
416 the probability of disabling change is greater than the probability of enabling change.  
417 In contrast, when the likelihood of producing WS types is affected by the mutational  
418 hotspot in *awsX*, then evolution will proceed via Wsp only when the probability of  
419 enabling change is greater than the probability of disabling change (Figure 4D and  
420 Figure 4 figure supplement 2).

421

#### 422 **Analysis of mutants reveals mutational targets and effects**

423

424 *Wsp pathway*: Mutations were identified in five genes of the seven-gene pathway all  
425 of which were predicted by the null model (Figure 4 – figure supplement 1). The most  
426 commonly mutated gene was *wspA* (PFLU1219), with ten of 15 mutations (Figure 5)  
427 being amino acid substitutions (six unique) clustered in the region 352-420 at the stalk  
428 of the signalling domain. This region has been implicated in trimer-of-dimer  
429 formation for the WspA homologue in *Pseudomonas aeruginosa* (O'Connor, et al.  
430 2012) which is critical for self-assembly and localization of Wsp clusters in the  
431 membrane. It is possible that these mutations stabilize trimer of dimer formation,

432 change the subcellular location of the Wsp complex, or affect interaction with WspD  
433 (putative interface 383-420 in WspA) (Griswold, et al. 2002) and thus affecting relay  
434 of signal to WspE. These effects we interpreted as enabling mutations increasing  $r_3$  in  
435 Figure 2A. The four additional mutations were in frame deletions in a separate region  
436 of the transducer domain ( $\Delta T293 - E299$ ,  $\Delta A281-A308$ ). Although it is possible that  
437 these mutations could also affect trimer-of-dimer formation, there are predicted  
438 methylation sites in the region (Rice and Dahlquist 1991) that regulate the activity of  
439 the protein via methyltransferase WspC and methylesterase WspF. Given that  
440 disabling mutations are more common than enabling mutations it is likely that these  
441 mutations decrease  $r_2$  in Figure 3A by disrupting the interaction with WspF. We also  
442 identified a single mutation that fused the open reading frame of WspC, the  
443 methyltransferase that positively regulates WspA activity, to WspD, resulting in a  
444 chimeric protein (Figure 5, Figure 5 – source data). This mutation is likely to be a rare  
445 enabling mutation that increases the activity of WspC (increasing  $r_1$  in Figure 3A) by  
446 physically tethering it to the WspABD complex thus allowing it to more effectively  
447 counteract the negative regulator WspF. Alternatively, the tethering may physically  
448 block the interaction with WspF (decrease of  $r_2$  in Figure 3A).

449

450 The second most commonly mutated gene in the *wsp* operon was *wspE* (PFLU1223)  
451 (Figure 5). Four amino acids were repeatedly mutated in the response regulatory  
452 domain of WspE and all cluster closely in a structural homology model made with  
453 Phyre2 (Kelley, et al. 2015). All mutated residues surround the active site of the  
454 phosphorylated D682 and it is likely that they disrupt feedback regulation by  
455 decreasing phosphorylation of the negative regulator WspF (decreasing  $r_6$ ) rather than  
456 increasing activation of WspR ( $r_5$  in Figure 3A).



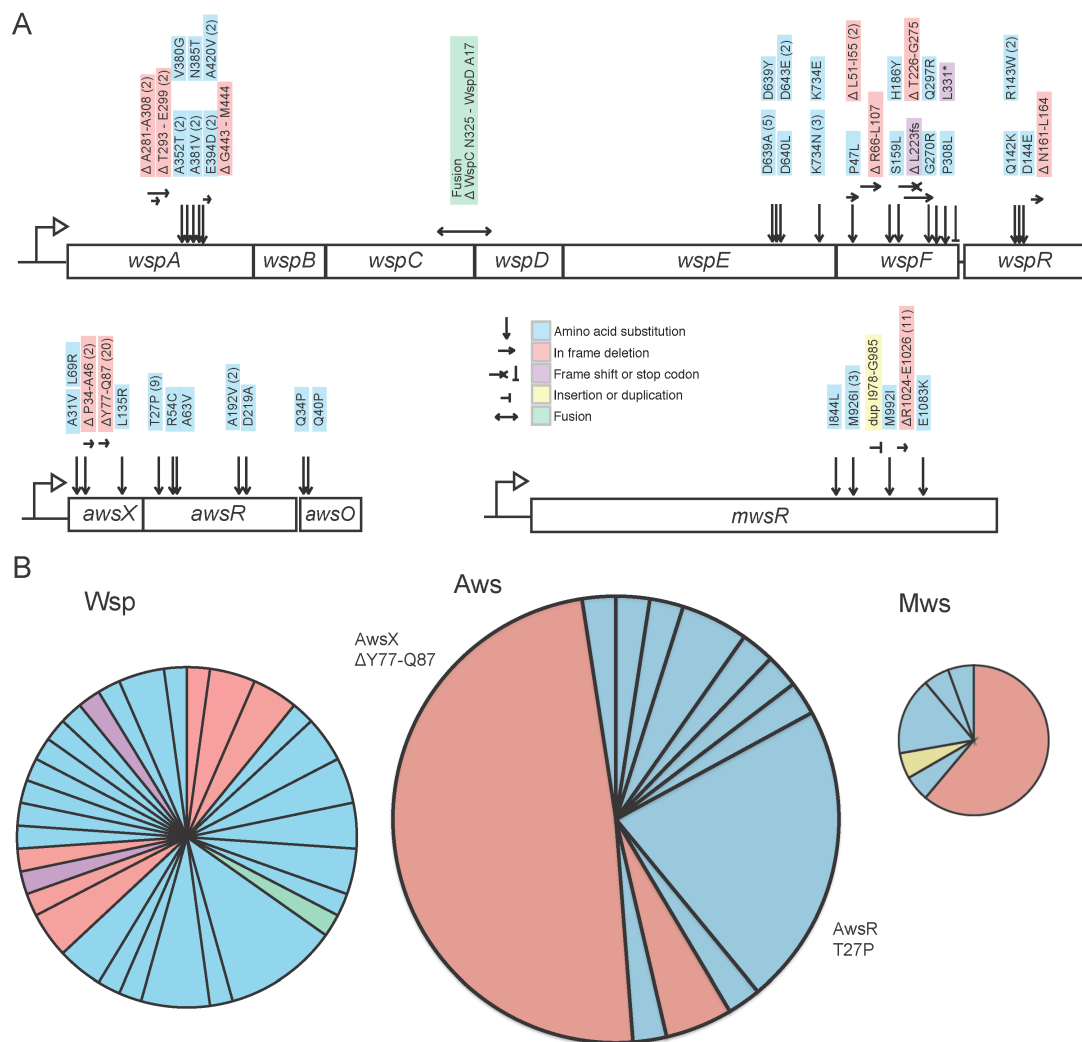

457

458 **Figure 5. Mutational targets.** (A) 105 independent mutations in the *wsp* (n=46), *aws*  
 459 (n=41) and *mws* (n=18) operons were identified. Numbers of independent mutants are  
 460 shown in brackets. Full details on the mutations are available in Figure 5 – source  
 461 data 1. (B) Diversity of mutations with area proportional to mutation rate (Figure 2).  
 462 Two mutations (AwsX ΔY77-Q87 and AwsR T27P) contribute 41% of all mutations  
 463 to WS suggesting that these are mutational hot spots. The increased mutation rate can  
 464 be incorporated into the null model by increasing the probability of change for  $r_2$  and  
 465  $r_3$  in the Aws model (Figure 3B).

466

467 Twelve mutations were detected in *wspF* (PFLU1224). These are distributed  
 468 throughout the gene and include amino acid substitutions, in-frame deletions as well  
 469 as a frame-shift and a stop codon (Figure 5). The pattern of mutations is consistent  
 470 with both the role of WspF as a negative regulator of WspA activity and the well-

471 characterised effect of loss-of-function mutations in this gene (Bantinaki, et al. 2007;  
472 McDonald, et al. 2009). The mutations are interpreted as decreasing  $r_2$  in Figure 3A.  
473 Five mutations were found in WspR (PFLU1225), the DGC output response regulator  
474 that produces c-di-GMP and activates expression of cellulose (Figure 5). All  
475 mutations were located in the linker region between the response regulator and DGC  
476 domains. Mutations in this region are known to generate constitutively active *wspR*  
477 alleles by relieving the requirement for phosphorylation (Goymer, et al. 2006). They  
478 may additionally affect subcellular clustering of WspR (Huangyutitham, et al. 2013)  
479 or shift the equilibrium between the dimeric form of WspR, with low basal activity,  
480 towards a tetrameric activated form (De, et al. 2009). In our model these increase  
481 reaction  $r_5$ .

482

483 *Aws pathway*: Mutations were identified in all three genes of the Aws pathway – all of  
484 which were predicted by the null model. In the Aws pathway, mutations were most  
485 commonly found in *awsX* (25 out of 41 mutations (Figure 5)). The above-mentioned  
486 mutational hotspot produced in-frame deletions likely mediated by 6 bp direct repeats  
487 (Figure 5 – source data 1). The deletions are consistent with a loss of function and a  
488 decrease in  $r_3$  (Figure 3B) that would leave the partially overlapping open reading  
489 frame of the downstream gene (*awsR*) unaffected.

490

491 The DGC AwsR, was mutated in 14 cases with an apparent mutational hot spot at  
492 T27P (9 mutants) in a predicted transmembrane helix (amino acids 19-41). The  
493 remaining mutations were amino acid substitutions in the HAMP linker and in the  
494 PAS-like periplasmic domain between the two transmembrane helices. These amino  
495 acid substitutions are removed from the output DGC domain (Figure 5) and their  
496 effects are difficult to interpret, but they could cause changes in dimerization  
497 (Malone, et al. 2012) or the packing of HAMP domains, which could, in turn, alter  
498 transmission of conformational changes in the periplasmic PAS-like domain to the  
499 DGC domain causing constitutive activation (Parkinson 2010). Such effects would  
500 increase  $r_4$  in Figure 3B. Mutations in the N-terminal part of the protein are easier to  
501 interpret based on the existing functional model (Malone, et al. 2012) and most likely  
502 disrupt interactions with the periplasmic negative regulator AwsX resulting in a  
503 decrease in  $r_3$  in Figure 3B.

504

505 Two mutations were found in the outer membrane lipoprotein protein AwsO between  
506 the signal peptide and the OmpA domain (Figure 5). Both mutations were glutamine  
507 to proline substitutions (Q34P, Q40P), which together with a previously reported  
508 G42V mutation (McDonald, et al. 2009) suggest that multiple changes in this small  
509 region can cause a WS phenotype. This is also supported by data from *Pseudomonas*  
510 *aeruginosa* in which mutations in nine different positions in this region lead to a small  
511 colony variant phenotype similar to WS (Malone, et al. 2012). A functional model  
512 based on the YfiBNR in *P. aeruginosa* (Malone, et al. 2012; Xu, et al. 2016), suggest  
513 that AwsO sequesters AwsX at the outer membrane and that mutations in the N-  
514 terminal part of the protein lead to constitutive activation and increased binding of  
515 AwsX. This would correspond to an increase in  $r_2$  in Figure 3B, which would relieve  
516 negative regulation of AwsR.

517

518 *Mws pathway*: The MwsR pathway (comprising just a single gene) harbours  
519 mutations in both DGC and phosphodiesterase (PDE) domains . Only mutations in  
520 the C-terminal phosphodiesterase (PDE) domain were predicted (Figure 3C). Eleven  
521 of 18 mutations were identical in-frame deletions ( $\Delta$ R1024-E1026) in the PDE  
522 domain, mediated by 8 bp direct repeats (Figure 5, Figure 5 – source data 1). It has  
523 been shown previously that deletion of the entire PDE domain generates the WS  
524 phenotype (McDonald, et al. 2009), suggesting a negative regulatory role that causes  
525 a decrease of  $r_2$  in the model in Figure 3C. One additional mutation was found in the  
526 PDE domain (E1083K) located close to R1024 in a structural homology model made  
527 with Phyre2 (Kelley, et al. 2015), but distant to the active site residues (E1059-  
528 L1061). Previously reported mutations (A1018T, ins1089DV) (McDonald, et al.  
529 2009) are also removed from the active site and cluster in the same region in a  
530 structural homology model. This suggests that loss of phosphodiesterase activity may  
531 not be the mechanism leading to the WS phenotype. This is also supported by the  
532 high solvent accessibility of the mutated residues, which indicates that major stability-  
533 disrupting mutations are unlikely and changes in interactions between domains or  
534 dimerization are more probable. Thus, it is likely that the WS phenotype resulting  
535 from a deletion in the PDE domain is caused by disruption of domain interactions or  
536 dimerization rather than loss of phosphodiesterase activity.

537

538 The remaining mutations within *mwsR* are amino acid substitutions in the GGDEF  
539 domain, close to the DGC active site (927-931) with the exception of a duplication of  
540 I978-G985. While it is possible that these mutations directly increase the catalytic  
541 activity of the DGC, increasing  $r_1$  in Figure 3C, such enabling mutations are  
542 considered to be rare. An alternative hypothesis is that these mutations either interfere  
543 with c-di-GMP feedback regulation or produce larger conformational changes that  
544 change inter-domain or inter-dimer interactions, similar to the mutations in the PDE  
545 domain. Based on these data we reject the current model of Mws function, which  
546 predicted mutations decreasing  $r_2$  (Figure 3C) through mutations inactivating the PDE  
547 domain. We instead suggest that the mutations are likely to disrupt the conformational  
548 dynamics between the domains and could be seen either as activating mutations  
549 causing constitutive activation or disabling mutations with much reduced mutational  
550 target size that must specifically disrupt the interaction surface between the domains.  
551 In both cases the previous model lead to an overestimation of the rate to WS for the  
552 Mws pathway.

553

#### 554 **Fitness of WS types**

555 We measured the fitness of representative WS types with mutations in each of the  
556 mutated genes (*wspA*, *wspC/D*, *wspE*, *wspF*, *wspR*, *awsX*, *awsR*, *awsO*, *mwsR*) in 1:1  
557 competitions against a reference WspF  $\Delta$ T226-G275 deletion mutant marked with  
558 GFP (Figure 6). This type of fitness data should be interpreted with caution because  
559 the fitness of WS mutants have been shown to be frequency dependent and some WS  
560 mutants are superior in early phase attachment as opposed to growth at the air-liquid  
561 interface (Lind, et al. 2015). Nevertheless, these competition experiments provide an  
562 estimate of fitness when several different WS mutants compete at the air-liquid  
563 interface (a likely situation given a  $\sim 10^{-8}$  mutation rate to WS and a final population  
564 size of  $>10^{10}$ ). The fitness data account for the over- or under-representation of some  
565 WS mutants when grown under selection (McDonald, et al. 2009) compared to those  
566 uncovered without selection (as reported here).

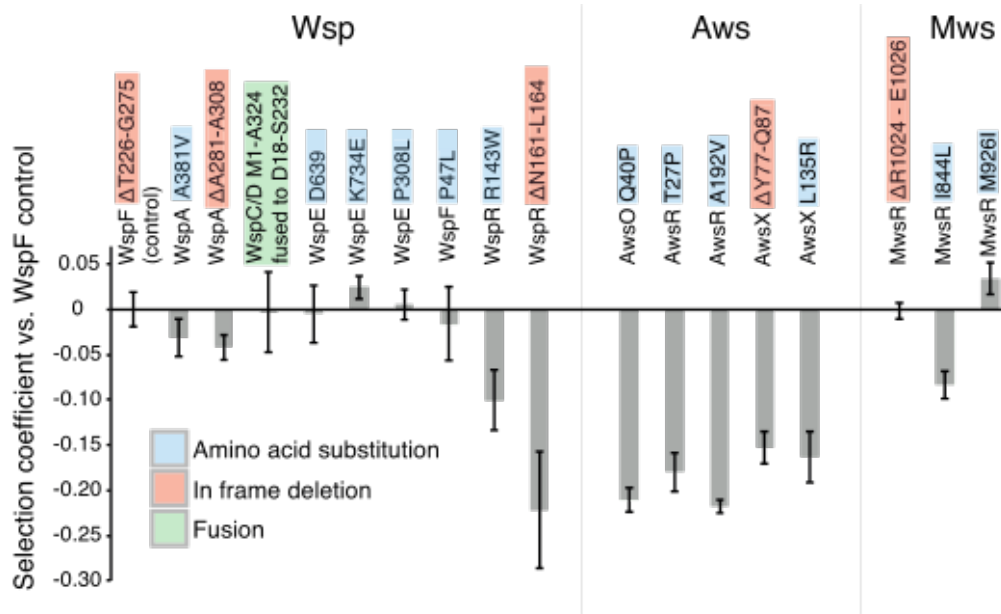

567

568 **Figure 6. Fitness of different WS mutants.** Competitive fitness against a WspF  
 569 ΔT226-G275 reference strain was measured for representative mutations in the Wsp,  
 570 Aws, Mws pathways. Pairwise competitions were performed in quadruplicates and  
 571 error bars represent +/- one standard deviation.

572

573 The three *wspF* mutants, the *wspC-wspD* fusion, and the *wspE* mutants have similar  
 574 fitness. In contrast, both *wspA* mutants are slightly less fit and both *wspR* mutants are  
 575 severely impaired (Figure 6). This sits in accord with previous work in which  
 576 mutations generating WS obtained with selection have been detected in *wspF* and  
 577 *wspE*, but not *wspA* or *wspR* (Goymier, et al. 2006; McDonald, et al. 2009). All  
 578 *awsXRO* mutants have similar low fitness compared to the *wspF* reference strain  
 579 (Figure 6), which explains why under selection these are found at lower frequencies  
 580 compared to mutations in the *wsp* pathway (McDonald, et al. 2009) despite a roughly  
 581 two-fold higher mutation rate to WS.

582

### 583 Differences of mutational spectra with and without selection

584 A final question concerns the outcome of the original experimental evolution under  
 585 selection (McDonald, et al. 2009) and whether it can be explained by our detailed  
 586 measurement of mutation rates, mutational targets and fitness assays. As indicated  
 587 above, there exist major differences in the spectrum of mutations isolated with and  
 588 without selection (Figure 7). The most obvious difference is in the use of the Wsp  
 589 pathway, which is most commonly used (15/24) under selection and yet produces WS

590 types at a lower rate than the *Aws* pathway. The explanation lies in the lower fitness  
591 of *Aws* mutants (Figure 6). Similarly, fitness effects also explains differences in the  
592 spectrum of *wsp* mutations, with no *wspA* mutations being found under selection  
593 despite being the most commonly mutated gene without selection (15/46). The  
594 previous failure to detect *wspR* mutants in a screen of 53 WS mutants (Goymer, et al.  
595 2006) is similarly explained by low fitness of WS types arising via mutations in this  
596 gene.

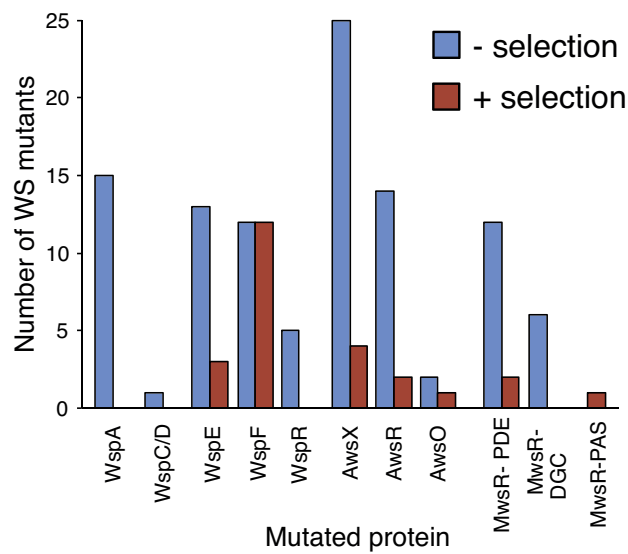

597  
598 **Figure 7. WS mutations isolated with and without selection.** Fitness effects bias  
599 the mutational spectrum observed under selection resulting in underrepresentation of  
600 *WspA* and *WspR* compared to *WspF* and *WspE*. Similar fitness effects of different  
601 *Aws* mutants lead to similar patterns regardless of selective conditions. Only within  
602 operon comparisons are valid for this figure as the mutants isolated without selection  
603 had double deletions of the other operons. Between operon mutation rates are  
604 available in Figure 2.

605

## 606 Discussion

607 The issue of evolutionary predictability and the relative importance of stochastic  
608 events compared to deterministic processes have a long history in evolutionary  
609 biology (Darwin 1872; Simpson 1949; Jacob 1977; Gould 1989; Conway Morris  
610 2003; Orgogozo 2015). Recent interest has been sparked by an increasing number of  
611 observations that evolution, under certain circumstances, can be remarkably  
612 repeatable (Colosimo, et al. 2005; Shindo, et al. 2005; Jost, et al. 2008; Barrick, et al.  
613 2009; Lee and Marx 2012; Meyer, et al. 2012; Zhen, et al. 2012; Herron and Doebeli

614 2013), but whether these cases are representative for evolutionary processes in  
615 general remains to be determined. A related question, with greater potential for  
616 practical applications, is whether it is possible to forecast short-term evolutionary  
617 events and if so, then the challenge is to stipulate the data necessary to make  
618 successful predictions.

619

620 Our uniquely detailed knowledge of the WS experimental evolution system has  
621 provided a rare opportunity to disentangle the contributions of selection, mutational  
622 biases and genetic architecture to evolutionary outcomes, and consequently explore  
623 the limits of evolutionary forecasting. A thorough understanding of the function of the  
624 molecular species and their interactions allowed development of a null model by  
625 defining the genotype-to-phenotype map, which successfully predicted mutational  
626 targets and the relative likelihood that evolution followed each of the three principle  
627 pathways. Importantly, genetic architecture is likely to be transferable between  
628 different species, which stands to allow the formulation of general principles and  
629 evolutionary rules (Lind, et al. 2015). Despite the simplicity of the mathematical null  
630 models, which contain only general information about functional interactions, we  
631 successfully predicted mutational targets including previously unknown mutations in  
632 *wspA*. Without information about fitness and mutational biases, however, only order  
633 of magnitude predictions of mutant frequencies can be made. Thus, it is possible to  
634 predict that Wsp, which is subject to negative regulation will be more common than a  
635 DGC that requires enabling mutations (Lind, et al. 2015), but not which of two  
636 pathways (Wsp and Aws) with differently wired negative regulation is likely to be  
637 dominant after selection. Insights from the null model combined with data on  
638 mutational targets also allowed us to reject our functional model of Mws.

639

640 Direct measurement of the fitness effects of large number of mutations is difficult and  
641 time-consuming and typically only possible for microbial species. Therefore future  
642 success in predicting fitness effects of mutations rests on the ability to infer them  
643 from other parameters, such as estimated effects of mutations on thermodynamic  
644 stability or molecular networks, or from incorporation of information concerning  
645 evolutionary conservation of amino acid residues. Alternatively, it might be possible  
646 to extrapolate findings from a small number of mutations that are either directly  
647 constructed and assayed in the laboratory or through fitness estimates of

648 polymorphisms data for natural populations. Recent work on the prediction of the  
649 fitness effects of random mutations in several genes suggests that in many cases large  
650 effect mutations can be predicted using methods based on evolutionary conservation  
651 (Lind, et al. 2017a).

652

653 Interestingly WS mutations in the same gene often have similar fitness effects (Figure  
654 6). Obviously no general conclusions can be drawn from these few cases, but if  
655 mutations with similar functional effects, for example disruption of a particular  
656 interaction, can be assumed to be equally fit, this would greatly reduce the number of  
657 specific mutants that need to be experimentally assayed for each gene. Several studies  
658 suggest that fitness distributions are often bimodal, with a significant proportion being  
659 complete loss-of-function mutations, which could explain the similar fitness effects of  
660 mutations in the same genes if they result in inactivation of a particular biochemical  
661 reaction of interaction (Sanjuan 2010; Jacquier, et al. 2013; Sarkisyan, et al. 2016;  
662 Lind, et al. 2017a). The extent to which fitness effects are transferable between strains  
663 with different genetic backgrounds or closely related species remains to be more fully  
664 investigated (Ungerer, et al. 2003; Pearson, et al. 2012; Wang, et al. 2014).

665

666 Estimates of genomic mutation rates are remarkably consistent across species (Drake  
667 1991), and mutational biases as evident in the types of base substitutions, are well-  
668 characterized for a large number of bacterial species (Sung, et al. 2012; Wei, et al.  
669 2014; Farlow, et al. 2015; Foster, et al. 2015; Long, et al. 2015). It is also known that  
670 molecular processes, such as transcription and replication, can introduce mutational  
671 biases (Beletskii and Bhagwat 1996; Hudson, et al. 2003; Lind and Andersson 2008;  
672 Reijns, et al. 2015; Zhao, et al. 2015) and mutational hotspots caused by  
673 homopolymeric tracts and direct repeats can greatly increase local mutation rate  
674 (Streisinger and Owen 1985; Seier, et al. 2011). However, the distribution of mutation  
675 rates across a gene or operon remains largely unknown. Absence of this knowledge  
676 currently hinders efforts to forecast adaptive evolution.

677

678 There are several cases of probable mutational hotspots in the spectrum of WS  
679 mutants found in this study before the influence of selection. One specific deletion  
680 ( $\Delta Y77-Q87$ ) in *awsX* accounts for nearly half (20/41) of the mutations in the Aws  
681 pathway. Thus, despite the existence of hundreds of possible mutations leading to WS



682 (this work and (McDonald, et al. 2009; McDonald, et al. 2011; Lind, et al. 2015)) one  
683 single mutation accounts for more than one quarter of all WS mutations. While the six  
684 base pair direct repeat flanking the deletion provides a convincing explanation for its  
685 increased rate, it is not clear why this deletion would be ten times more common than  
686 the  $\Delta P34-A46$  deletion in the same gene that is flanked by ten base pair repeats and  
687 contains five base pairs identical to those from the  $\Delta Y77-Q87$  deletion (Figure 5 –  
688 source data 1). There are also instances where single base pair substitutions are  
689 overrepresented: the AwsR T27P mutation is found in nine cases, while eight other  
690 single pair substitutions in Aws were found only once. Consider further the fact that  
691 WspE (a gene of ~2.3 kb), where changes to only four specific amino acids repeatedly  
692 cause WS, and WspF (a gene of ~1 kb) where any mutation that disrupts function  
693 results in WS (Figure 5) contribute equally to the evolution of WS types. Together,  
694 these findings draw attention to the limited value of including mutational target size  
695 alone as a parameter in predictive models.

696

697 It is evident from these findings and from related studies (Pollock and Larkin 2004)  
698 that there is need for detailed experimental measurement of local mutation rates in  
699 specific systems. Such investigations stand to contribute to understanding of the  
700 causes of mutational bias and the extent to which biases might be conserved among  
701 related or even unrelated organisms. If local nucleotide sequence is the major  
702 determinant, an estimate of mutation rate will apply strictly to very closely related  
703 species, but if the dynamics of molecular processes, such as transcription and  
704 replication (Sankar, et al. 2016), are major influences then estimates might be  
705 applicable to a wider range of species.

706

707 Evolutionary forecasting is likely to be most successful for biological systems where  
708 there are experimental data on a large number of independent evolutionary events,  
709 such as influenza, HIV and cancer (Kouyos, et al. 2012; Fraser, et al. 2014; Lawrence,  
710 et al. 2014; Luksza and Lassig 2014; Neher, et al. 2014; Eirew, et al. 2015). Evolution  
711 might appear idiosyncratic indicating that every specific system requires detailed  
712 investigation, but our hope is that deeper knowledge of the distribution of fitness  
713 effects and mutational biases will allow short term forecasts to be produced using  
714 modelling without the need for large-scale experimental studies. A major boost to  
715 further refinement of evolutionary forecasting is likely to come from combining

716 coarse and fine-grained approaches. Our demonstration that simple null models of  
717 functional networks can produce highly relevant quantitative predictions is an  
718 important step forward allowing predictions to be directly tested in other experimental  
719 systems.

720

## 721 **Materials and methods**

722

### 723 **Strains and media**

724 The strains used in the study are all *Pseudomonas fluorescens* SBW25 (Silby, et al.  
725 2009) or derivatives thereof. The reporter construct (pMSC), used for isolation of WS  
726 mutants before selection, fused the  $P_{wss}$  promoter to a kanamycin resistance marker  
727 (*nptII*) (Fukami, et al. 2007; McDonald, et al. 2011). *P. fluorescens* strains with  
728 deletions of the *wsp* (PFLU1219-1225), *aws* (PFLU5209-5211) and *mws* (PFLU5329)  
729 operons were previously constructed as described by McDonald *et al.* (McDonald, et  
730 al. 2011). All experiments used King's medium B (KB) (King, et al. 1954), solidified  
731 with 1.5% agar and incubation was at 28°C. All strains were stored in glycerol saline  
732 at -80°C.

733

### 734 **Fluctuation tests and isolation of WS mutants before selection**

735 Strains with the pMSC reporter construct and either wild type genetic background or  
736 double deletions of *aws/mws*, *wsp/mws* or *wsp/aws* were used to estimate mutation  
737 rates to WS before selection. Overnight cultures were diluted to approximately  $10^3$   
738 cfu/ml and 60 independent 110 ul cultures were grown for 16-19 h (OD600= 0.9-1.0)  
739 with shaking (200 rpm) in 96-well plates before plating on KB plates with 30 mg/l  
740 kanamycin. Viable counts were estimated by serial dilution and plating on KB agar.  
741 One randomly chosen colony per independent culture with WS colony morphology  
742 was restreaked once on KB agar. The assay was repeated at least four times for the  
743 double deletion mutants and twice for the wild type strain. Mutations rates were  
744 estimated using the Ma-Sandri-Sarkar Maximum Likelihood Estimator (Hall, et al.  
745 2009) available at [www.keshavsingh.org/protocols/FALCOR.html](http://www.keshavsingh.org/protocols/FALCOR.html).

746

### 747 **Sequencing**

748 Mutations causing the WS phenotype were identified by Sanger sequencing of  
749 candidate genes in the remaining common pathway to WS, for example the *wsp*  
750 operon for the *aws/mws* deletion strain. In a few cases where no mutations were  
751 identified in the previously established WS target genes, we used genome sequencing  
752 (Illumina HiSeq, performed by Macrogen Korea).

753

#### 754 **Fitness assays**

755 Competition assays were performed as previously described (Lind, et al. 2015) by  
756 mixing the WS mutant 1:1 with a reference strain labelled with green fluorescent  
757 protein and measuring the ratio of each strain before and after static growth for 24 h  
758 using flow cytometry (BD FACS Canto). We used a WspF  $\Delta$ T226-G275 deletion  
759 mutant as the reference strain because WspF mutants are the most commonly found  
760 WS type when grown under selective conditions (McDonald, et al. 2009) and the in  
761 frame deletion of 50 amino acids most likely represents a complete loss-of-function  
762 mutation with minimal polar effects on the downstream *wspR*. Selection coefficients  
763 per generation were calculated as  $s = [\ln(R(t)/R(0))]/[t]$ , as previously described  
764 (Dykhuizen 1990) where R is the ratio of alternative WS mutant to WspF  $\Delta$ T226-  
765 G275 GFP and t the number of generations determined using viable counts. Control  
766 competition experiments with isogenic WspF  $\Delta$ T226-G275 reference strains with and  
767 without GFP were used to correct for the cost of the GFP marker. Control  
768 competitions were also used to determine the cost of the double deletions and the  
769 reporter construct relative to a wild type genetic background, for example an AwsX  
770  $\Delta$ Y77-Q87 mutant in  $\Delta$ *wsp*/ $\Delta$ *mws* background with pMSC was competed with a GFP  
771 labeled AwsX  $\Delta$ Y77-Q87 mutant in wild type background. Competitions were  
772 performed independently inoculated quadruplicates for each strain.

773

#### 774 **Homology models**

775 Homology models of the structure of WspA, WspE, WspR, AwsR, AwsO and MwsR  
776 were made using Phyre2 in intensive mode (<http://www.sbg.bio.ic.ac.uk/phyre2>)  
777 (Kelley, et al. 2015).

778

#### 779 **Probability estimation in the mathematical models**

780 The differential equation models describe the interactions between proteins in each of  
781 the three WS pathways. In order to solve the differential equations, two pieces of

782 information are required: i) the initial concentrations of the molecular species and ii)  
783 the reaction rates. Although this information is unavailable a random-sampling  
784 approach was used to generate different random sets of initial concentrations and  
785 reaction rates. Each random set was used to establish a baseline of potential WS  
786 expression making it possible to evaluate whether a set of mutations results in a WS  
787 type. Effectively, this approach allows sampling of the probability distribution  $P(\text{WS}$   
788  $|m_i \in \text{Wsp})$  used in our Bayesian model.

789

790 We randomly sample 1,000 different sets of reaction rates and initial concentrations  
791 from uniform priors: reaction rates were sampled randomly from a uniform  
792 distribution on log space (i.e.  $10^{U[-2,2]}$ ) and initial concentrations of reactants were  
793 sampled from a uniform distribution  $U[0,10]$ . For each set, the appropriate differential  
794 equation model was integrated and the steady state concentration of the compounds  
795 that correspond to a wrinkly spreader (RR in Aws,  $R^*$  in Wsp and  $D^*$  for Mws)  
796 computed. This served as a baseline for the non-WS phenotype that was used for  
797 comparison to determine whether combinations of mutations result in increased WS  
798 expression. After obtaining the baseline, we implemented particular combinations of  
799 enabling/disabling mutations (a  $m_i$ ). Ideally, a distribution linking enabling/disabling  
800 mutations to a fold change in reaction rates would be used, but this information is  
801 unavailable. In order to progress the effect sizes for enabling and disabling mutations  
802 were sampled from  $10^{U[0,2]}$  and  $10^{U[-2,0]}$ , respectively, and then multiplied by the  
803 reaction rates. The differential equations were then solved for the same time that it  
804 took the baseline to reach steady state. The final concentration of  $R^*$  (Figure 3A), RR  
805 (Figure 3B) and  $D^*$  (Figure 3C) was then compared to the baseline and the number of  
806 times out of 1,000 that the WS-inducing compound increased served as an estimate of  
807  $P(\text{WS}|m_i \in \text{Wsp})$ . The probability distribution stabilized by 500 random samples  
808 and additional sampling did not produce significant changes (data not shown).

809

810 The absence of empirical data on reaction rates, initial concentrations, and expected  
811 mutation effect size meant using a random sampling approach requiring estimates for  
812 parameter ranges. Parameter ranges were chosen to be broad enough to capture  
813 differences spanning several orders of magnitudes while allowing numerical  
814 computations for solving the differential equations. To assess the effect of these

815 ranges on the results, the sampling procedure was repeated for WSP for three  
816 different parameter regimes i) an expanded range for initial concentrations [0-50], ii)  
817 an expanded range for reaction rates  $10^{[-3,3]}$ , iii) a compressed range for mutational  
818 effect size  $10^{[-1,1]}$ . This analysis shows that qualitative results are robust to these  
819 changes (see Figure S1).

820

821 Source code for the mathematical modelling is deposited as supplemental material.

822

### 823 **Acknowledgements**

824 This work was supported by Marsden Fund Council from New Zealand Government  
825 funding, administered by the Royal Society of New Zealand.

826

### 827 **Competing interests**

828 The authors declare no competing interests.

829

### 830 **Author contributions**

831 **Peter A. Lind** Conceptualization, Methodology, Investigation, Data Curation,

832 Writing—original draft, Writing—review and editing, Visualization

833

834 **Eric Libby** Conceptualization, Methodology, Software, Formal analysis,

835 Investigation, Writing—original draft, Writing—review and editing, Visualization

836

837 **Jenny Herzog** Methodology, Investigation, Data Curation

838

839 **Paul B. Rainey** Conceptualization, Methodology, Validation, Writing—original

840 draft, Writing—review and editing, Visualization, Supervision, Project

841 administration, Funding acquisition

842 **References**

843

844 Alberch P. 1991. From genes to phenotype: dynamical systems and evolvability.

845 *Genetica* 84:5-11.

846 Bailey SF, Blanquart F, Bataillon T, Kassen R. 2017. What drives parallel evolution?:

847 How population size and mutational variation contribute to repeated evolution.

848 *Bioessays* 39:1-9. <http://dx.doi.org/10.1002/bies.201600176>

849 Bantinaki E, Kassen R, Knight CG, Robinson Z, Spiers AJ, Rainey PB. 2007.

850 Adaptive divergence in experimental populations of *Pseudomonas fluorescens*. III.

851 Mutational origins of wrinkly spreader diversity. *Genetics* 176:441-453.

852 <http://dx.doi.org/10.1534/genetics.106.069906>

853 Barrick JE, Yu DS, Yoon SH, Jeong H, Oh TK, Schneider D, Lenski RE, Kim JF.

854 2009. Genome evolution and adaptation in a long-term experiment with

855 *Escherichia coli*. *Nature* 461:1243-1247. <http://dx.doi.org/10.1038/nature08480>

856 Beletskii A, Bhagwat AS. 1996. Transcription-induced mutations: increase in C to T

857 mutations in the nontranscribed strand during transcription in *Escherichia coli*.

858 *Proceedings of the National Academy of Sciences of the United States of America*

859 93:13919-13924.

860 Colosimo PF, Hosemann KE, Balabhadra S, Villarreal G, Jr., Dickson M, Grimwood

861 J, Schmutz J, Myers RM, Schluter D, Kingsley DM. 2005. Widespread parallel

862 evolution in sticklebacks by repeated fixation of *Ectodysplasin* alleles. *Science*

863 307:1928-1933. <http://dx.doi.org/10.1126/science.1107239>

- 864 Conway Morris S. 2003. Life's solution inevitable humans in a lonely universe. New  
865 York u.a.: Cambridge Univ. Press.
- 866 Darwin C. 1872. The origin of species by means of natural selection, or, The  
867 preservation of favoured races in the struggle for life. London: John Murray.
- 868 De N, Navarro MV, Raghavan RV, Sondermann H. 2009. Determinants for the  
869 activation and autoinhibition of the diguanylate cyclase response regulator WspR.  
870 J Mol Biol 393:619-633. <http://dx.doi.org/10.1016/j.jmb.2009.08.030>
- 871 de Visser JA, Krug J. 2014. Empirical fitness landscapes and the predictability of  
872 evolution. Nature reviews. Genetics 15:480-490. <http://dx.doi.org/10.1038/nrg3744>
- 873 Drake JW. 1991. A constant rate of spontaneous mutation in DNA-based microbes.  
874 Proceedings of the National Academy of Sciences of the United States of America  
875 88:7160-7164.
- 876 Dykhuizen DE. 1990. Experimental studies of natural selection in bacteria. Annu.  
877 Rev. Ecol. Syst. 21:373-398.
- 878 Eirew P, Steif A, Khattra J, Ha G, Yap D, Farahani H, Gelmon K, Chia S, Mar C,  
879 Wan A, et al. 2015. Dynamics of genomic clones in breast cancer patient  
880 xenografts at single-cell resolution. Nature 518:422-426.  
881 <http://dx.doi.org/10.1038/nature13952>
- 882 Eyre-Walker A, Keightley PD. 2007. The distribution of fitness effects of new  
883 mutations. Nature reviews. Genetics 8:610-618. <http://dx.doi.org/10.1038/nrg2146>

- 884 Farlow A, Long H, Arnoux S, Sung W, Doak TG, Nordborg M, Lynch M. 2015. The  
885 Spontaneous Mutation Rate in the Fission Yeast *Schizosaccharomyces pombe*.  
886 *Genetics* 201:737-744. <http://dx.doi.org/10.1534/genetics.115.177329>
- 887 Ferguson GC, Bertels F, Rainey PB. 2013. Adaptive Divergence in Experimental  
888 Populations of *Pseudomonas fluorescens*. V. Insight into the Niche Specialist  
889 "Fuzzy Spreader" Compels Revision of the Model *Pseudomonas* Radiation.  
890 *Genetics*. <http://dx.doi.org/10.1534/genetics.113.154948>
- 891 Flowers JM, Hanzawa Y, Hall MC, Moore RC, Purugganan MD. 2009. Population  
892 genomics of the *Arabidopsis thaliana* flowering time gene network. *Molecular*  
893 *biology and evolution* 26:2475-2486. <http://dx.doi.org/10.1093/molbev/msp161>
- 894 Foster PL, Lee H, Popodi E, Townes JP, Tang H. 2015. Determinants of spontaneous  
895 mutation in the bacterium *Escherichia coli* as revealed by whole-genome  
896 sequencing. *Proceedings of the National Academy of Sciences of the United States*  
897 *of America* 112:E5990-5999. <http://dx.doi.org/10.1073/pnas.1512136112>
- 898 Fraebel DT, Mickalide H, Schnitkey D, Merritt J, Kuhlman TE, Kuehn S. 2017.  
899 Environment determines evolutionary trajectory in a constrained phenotypic space.  
900 *Elife* 6. <http://dx.doi.org/10.7554/eLife.24669>
- 901 Fraser C, Lythgoe K, Leventhal GE, Shirreff G, Hollingsworth TD, Alizon S,  
902 Bonhoeffer S. 2014. Virulence and pathogenesis of HIV-1 infection: an  
903 evolutionary perspective. *Science* 343:1243727.  
904 <http://dx.doi.org/10.1126/science.1243727>



- 905 Fukami T, Beaumont HJ, Zhang XX, Rainey PB. 2007. Immigration history controls  
906 diversification in experimental adaptive radiation. *Nature* 446:436-439.  
907 <http://dx.doi.org/10.1038/nature05629>
- 908 Galen SC, Natarajan C, Moriyama H, Weber RE, Fago A, Benham PM, Chavez AN,  
909 Cheviron ZA, Storz JF, Witt CC. 2015. Contribution of a mutational hot spot to  
910 hemoglobin adaptation in high-altitude Andean house wrens. *Proceedings of the*  
911 *National Academy of Sciences of the United States of America* 112:13958-13963.  
912 <http://dx.doi.org/10.1073/pnas.1507300112>
- 913 Gompel N, Prud'homme B. 2009. The causes of repeated genetic evolution. *Dev Biol*  
914 332:36-47. <http://dx.doi.org/10.1016/j.ydbio.2009.04.040>
- 915 Gould SJ. 1989. *Wonderful life : the Burgess Shale and the nature of history*. New  
916 York: W.W. Norton.
- 917 Goymer P, Kahn SG, Malone JG, Gehrig SM, Spiers AJ, Rainey PB. 2006. Adaptive  
918 divergence in experimental populations of *Pseudomonas fluorescens*. II. Role of  
919 the GGDEF regulator WspR in evolution and development of the wrinkly spreader  
920 phenotype. *Genetics* 173:515-526. <http://dx.doi.org/10.1534/genetics.106.055863>
- 921 Griswold IJ, Zhou HJ, Matison M, Swanson RV, McIntosh LP, Simon MI, Dahlquist  
922 FW. 2002. The solution structure and interactions of CheW from *Thermotoga*  
923 *maritima*. *Nature Structural Biology* 9:121-125. <http://dx.doi.org/DOI>  
924 [10.1038/nsb753](http://dx.doi.org/10.1038/nsb753)
- 925 Hall BM, Ma CX, Liang P, Singh KK. 2009. Fluctuation analysis CalculatOR: a web  
926 tool for the determination of mutation rate using Luria-Delbruck fluctuation

- 927 analysis. *Bioinformatics* 25:1564-1565.
- 928 <http://dx.doi.org/10.1093/bioinformatics/btp253>
- 929 Hammerschmidt K, Rose CJ, Kerr B, Rainey PB. 2014. Life cycles, fitness  
930 decoupling and the evolution of multicellularity. *Nature* 515:75-79.
- 931 <http://dx.doi.org/10.1038/nature13884>
- 932 Heilbron K, Toll-Riera M, Kojadinovic M, MacLean RC. 2014. Fitness is strongly  
933 influenced by rare mutations of large effect in a microbial mutation accumulation  
934 experiment. *Genetics* 197:981-990. <http://dx.doi.org/10.1534/genetics.114.163147>
- 935 Herron MD, Doebeli M. 2013. Parallel evolutionary dynamics of adaptive  
936 diversification in *Escherichia coli*. *PLoS biology* 11:e1001490.
- 937 <http://dx.doi.org/10.1371/journal.pbio.1001490>
- 938 Huangyutitham V, Guvener ZT, Harwood CS. 2013. Subcellular clustering of the  
939 phosphorylated WspR response regulator protein stimulates its diguanylate cyclase  
940 activity. *MBio* 4:e00242-00213. <http://dx.doi.org/10.1128/mBio.00242-13>
- 941 Hudson RE, Bergthorsson U, Ochman H. 2003. Transcription increases multiple  
942 spontaneous point mutations in *Salmonella enterica*. *Nucleic Acids Res* 31:4517-  
943 4522.
- 944 Jacob F. 1977. Evolution and tinkering. *Science* 196:1161-1166.
- 945 Jacquier H, Birgy A, Le Nagard H, Mechulam Y, Schmitt E, Glodt J, Bercot B, Petit  
946 E, Poulain J, Barnaud G, et al. 2013. Capturing the mutational landscape of the  
947 beta-lactamase TEM-1. *Proc Natl Acad Sci U S A* 110:13067-13072.
- 948 <http://dx.doi.org/10.1073/pnas.1215206110>

- 949 Jost MC, Hillis DM, Lu Y, Kyle JW, Fozzard HA, Zakon HH. 2008. Toxin-resistant  
950 sodium channels: parallel adaptive evolution across a complete gene family.  
951 *Molecular biology and evolution* 25:1016-1024.  
952 <http://dx.doi.org/10.1093/molbev/msn025>
- 953 Kelley LA, Mezulis S, Yates CM, Wass MN, Sternberg MJ. 2015. The Phyre2 web  
954 portal for protein modeling, prediction and analysis. *Nat Protoc* 10:845-858.  
955 <http://dx.doi.org/10.1038/nprot.2015.053>
- 956 King EO, Ward MK, Raney DE. 1954. Two simple media for the demonstration of  
957 pyocyanin and fluorescein. *The Journal of laboratory and clinical medicine* 44:301-  
958 307.
- 959 Kouyos RD, Leventhal GE, Hinkley T, Haddad M, Whitcomb JM, Petropoulos CJ,  
960 Bonhoeffer S. 2012. Exploring the complexity of the HIV-1 fitness landscape.  
961 *PLoS genetics* 8:e1002551. <http://dx.doi.org/10.1371/journal.pgen.1002551>
- 962 Kram KE, Geiger C, Ismail WM, Lee H, Tang H, Foster PL, Finkel SE. 2017.  
963 Adaptation of *Escherichia coli* to Long-Term Serial Passage in Complex Medium:  
964 Evidence of Parallel Evolution. *mSystems* 2.  
965 <http://dx.doi.org/10.1128/mSystems.00192-16>
- 966 Krasovec R, Richards H, Gifford DR, Hatcher C, Faulkner KJ, Belavkin RV,  
967 Channon A, Aston E, McBain AJ, Knight CG. 2017. Spontaneous mutation rate is  
968 a plastic trait associated with population density across domains of life. *PLoS*  
969 *biology* 15:e2002731. <http://dx.doi.org/10.1371/journal.pbio.2002731>
- 970 Kugelberg E, Kofoid E, Andersson DI, Lu Y, Mellor J, Roth FP, Roth JR. 2010. The  
971 tandem inversion duplication in *Salmonella enterica*: selection drives unstable

- 972 precursors to final mutation types. *Genetics* 185:65-80.  
973 <http://dx.doi.org/10.1534/genetics.110.114074>
- 974 Laland KN, Uller T, Feldman MW, Sterelny K, Muller GB, Moczek A, Jablonka E,  
975 Odling-Smee J. 2015. The extended evolutionary synthesis: its structure,  
976 assumptions and predictions. *Proceedings. Biological sciences / The Royal Society*  
977 282:20151019. <http://dx.doi.org/10.1098/rspb.2015.1019>
- 978 Lässig M, Mustonen V, Walczak AM. 2017. Predicting evolution. *Nature Ecology &*  
979 *Evolution* 1:0077. <http://dx.doi.org/10.1038/s41559-017-0077>
- 980 Lawrence MS, Stojanov P, Mermel CH, Robinson JT, Garraway LA, Golub TR,  
981 Meyerson M, Gabriel SB, Lander ES, Getz G. 2014. Discovery and saturation  
982 analysis of cancer genes across 21 tumour types. *Nature* 505:495-501.  
983 <http://dx.doi.org/10.1038/nature12912>
- 984 Lee MC, Marx CJ. 2012. Repeated, selection-driven genome reduction of accessory  
985 genes in experimental populations. *PLoS genetics* 8:e1002651.  
986 <http://dx.doi.org/10.1371/journal.pgen.1002651>
- 987 Levinson G, Gutman GA. 1987. Slipped-strand mispairing: a major mechanism for  
988 DNA sequence evolution. *Molecular biology and evolution* 4:203-221.  
989 <http://dx.doi.org/10.1093/oxfordjournals.molbev.a040442>
- 990 Lind PA, Andersson DI. 2008. Whole-genome mutational biases in bacteria.  
991 *Proceedings of the National Academy of Sciences of the United States of America*  
992 105:17878-17883. <http://dx.doi.org/10.1073/pnas.0804445105>

- 993 Lind PA, Arvidsson L, Berg OG, Andersson DI. 2017a. Variation in Mutational  
994 Robustness between Different Proteins and the Predictability of Fitness Effects.  
995 Molecular biology and evolution 34:408-418.  
996 <http://dx.doi.org/10.1093/molbev/msw239>
- 997 Lind PA, Farr AD, Rainey PB. 2017b. Evolutionary convergence in experimental  
998 Pseudomonas populations. ISME J 11:589-600.  
999 <http://dx.doi.org/10.1038/ismej.2016.157>
- 1000 Lind PA, Farr AD, Rainey PB. 2015. Experimental evolution reveals hidden diversity  
1001 in evolutionary pathways. Elife 4. <http://dx.doi.org/10.7554/eLife.07074>
- 1002 Long H, Kucukyildirim S, Sung W, Williams E, Lee H, Ackerman M, Doak TG,  
1003 Tang H, Lynch M. 2015. Background Mutational Features of the Radiation-  
1004 Resistant Bacterium Deinococcus radiodurans. Molecular biology and evolution  
1005 32:2383-2392. <http://dx.doi.org/10.1093/molbev/msv119>
- 1006 Lovett ST. 2004. Encoded errors: mutations and rearrangements mediated by  
1007 misalignment at repetitive DNA sequences. Mol Microbiol 52:1243-1253.  
1008 <http://dx.doi.org/10.1111/j.1365-2958.2004.04076.x>
- 1009 Luksza M, Lassig M. 2014. A predictive fitness model for influenza. Nature 507:57-  
1010 61. <http://dx.doi.org/10.1038/nature13087>
- 1011 Luria SE, Delbruck M. 1943. Mutations of Bacteria from Virus Sensitivity to Virus  
1012 Resistance. Genetics 28:491-511.

- 1013 Lynch M. 2010. Rate, molecular spectrum, and consequences of human mutation.  
1014 Proceedings of the National Academy of Sciences of the United States of America  
1015 107:961-968. <http://dx.doi.org/10.1073/pnas.0912629107>
- 1016 Maharjan RP, Ferenci T. 2017. A shifting mutational landscape in 6 nutritional states:  
1017 Stress-induced mutagenesis as a series of distinct stress input-mutation output  
1018 relationships. PLoS biology 15:e2001477.  
1019 <http://dx.doi.org/10.1371/journal.pbio.2001477>
- 1020 Malone JG, Jaeger T, Manfredi P, Dotsch A, Blanka A, Bos R, Cornelis GR, Haussler  
1021 S, Jenal U. 2012. The YfiBNR signal transduction mechanism reveals novel targets  
1022 for the evolution of persistent *Pseudomonas aeruginosa* in cystic fibrosis airways.  
1023 PLoS Pathog 8:e1002760. <http://dx.doi.org/10.1371/journal.ppat.1002760>
- 1024 Malone JG, Jaeger T, Spangler C, Ritz D, Spang A, Arrieumerlou C, Kaefer V,  
1025 Landmann R, Jenal U. 2010. YfiBNR mediates cyclic di-GMP dependent small  
1026 colony variant formation and persistence in *Pseudomonas aeruginosa*. PLoS  
1027 Pathog 6:e1000804. <http://dx.doi.org/10.1371/journal.ppat.1000804>
- 1028 Martin P, Sun L, Hood DW, Moxon ER. 2004. Involvement of genes of genome  
1029 maintenance in the regulation of phase variation frequencies in *Neisseria*  
1030 meningitidis. Microbiology 150:3001-3012.  
1031 <http://dx.doi.org/10.1099/mic.0.27182-0>
- 1032 McDonald MJ, Cooper TF, Beaumont HJE, Rainey PB. 2011. The distribution of  
1033 fitness effects of new beneficial mutations in *Pseudomonas fluorescens*. Biology  
1034 Letters 7:98-100. <http://dx.doi.org/Doi 10.1098/Rsbl.2010.0547>

- 1035 McDonald MJ, Gehrig SM, Meintjes PL, Zhang XX, Rainey PB. 2009. Adaptive  
1036 divergence in experimental populations of *Pseudomonas fluorescens*. IV. Genetic  
1037 constraints guide evolutionary trajectories in a parallel adaptive radiation. *Genetics*  
1038 183:1041-1053. <http://dx.doi.org/10.1534/genetics.109.107110>
- 1039 Meyer JR, Dobias DT, Weitz JS, Barrick JE, Quick RT, Lenski RE. 2012.  
1040 Repeatability and contingency in the evolution of a key innovation in phage  
1041 lambda. *Science* 335:428-432. <http://dx.doi.org/10.1126/science.1214449>
- 1042 Moxon ER, Rainey PB, Nowak MA, Lenski RE. 1994. Adaptive evolution of highly  
1043 mutable loci in pathogenic bacteria. *Current biology : CB* 4:24-33.
- 1044 Neher RA, Russell CA, Shraiman BI. 2014. Predicting evolution from the shape of  
1045 genealogical trees. *Elife* 3. <http://dx.doi.org/10.7554/eLife.03568>
- 1046 Orgogozo V. 2015. Replaying the tape of life in the twenty-first century. *Interface*  
1047 *Focus* 5:20150057. <http://dx.doi.org/10.1098/rsfs.2015.0057>
- 1048 Orr HA. 2005. The genetic theory of adaptation: a brief history. *Nature reviews.*  
1049 *Genetics* 6:119-127. <http://dx.doi.org/10.1038/nrg1523>
- 1050 Ostrowski EA, Woods RJ, Lenski RE. 2008. The genetic basis of parallel and  
1051 divergent phenotypic responses in evolving populations of *Escherichia coli*.  
1052 *Proceedings. Biological sciences / The Royal Society* 275:277-284.  
1053 <http://dx.doi.org/10.1098/rspb.2007.1244>
- 1054 Parkinson JS. 2010. Signaling mechanisms of HAMP domains in chemoreceptors and  
1055 sensor kinases. *Annu Rev Microbiol* 64:101-122.  
1056 <http://dx.doi.org/10.1146/annurev.micro.112408.134215>

- 1057 Pearson VM, Miller CR, Rokyta DR. 2012. The consistency of beneficial fitness  
1058 effects of mutations across diverse genetic backgrounds. *Plos One* 7:e43864.  
1059 <http://dx.doi.org/10.1371/journal.pone.0043864>
- 1060 Phippen CW, Mikolajek H, Schlaefli HG, Keevil CW, Webb JS, Tews I. 2014.  
1061 Formation and dimerization of the phosphodiesterase active site of the  
1062 *Pseudomonas aeruginosa* MorA, a bi-functional c-di-GMP regulator. *FEBS Lett*  
1063 588:4631-4636. <http://dx.doi.org/10.1016/j.febslet.2014.11.002>
- 1064 Pigliucci M. 2010. Genotype-phenotype mapping and the end of the 'genes as  
1065 blueprint' metaphor. *Philosophical transactions of the Royal Society of London.*  
1066 *Series B, Biological sciences* 365:557-566.  
1067 <http://dx.doi.org/10.1098/rstb.2009.0241>
- 1068 Pollock DD, Larkin JC. 2004. Estimating the degree of saturation in mutant screens.  
1069 *Genetics* 168:489-502. <http://dx.doi.org/10.1534/genetics.103.024430>
- 1070 Rainey PB, Remigi P, Farr AD, Lind PA. 2017. Darwin was right: where now for  
1071 experimental evolution? *Curr Opin Genet Dev* 47:102-109.  
1072 <http://dx.doi.org/10.1016/j.gde.2017.09.003>
- 1073 Reams AB, Roth JR. 2015. Mechanisms of gene duplication and amplification. *Cold*  
1074 *Spring Harb Perspect Biol* 7:a016592.  
1075 <http://dx.doi.org/10.1101/cshperspect.a016592>
- 1076 Reijns MA, Kemp H, Ding J, de Proce SM, Jackson AP, Taylor MS. 2015. Lagging-  
1077 strand replication shapes the mutational landscape of the genome. *Nature* 518:502-  
1078 506. <http://dx.doi.org/10.1038/nature14183>



- 1079 Rice MS, Dahlquist FW. 1991. Sites of deamidation and methylation in Tsr, a  
1080 bacterial chemotaxis sensory transducer. *J Biol Chem* 266:9746-9753.
- 1081 Richardson AR, Stojiljkovic I. 2001. Mismatch repair and the regulation of phase  
1082 variation in *Neisseria meningitidis*. *Mol Microbiol* 40:645-655.
- 1083 Roth JR, Benson N, Galitsky T, Haack K, Lawrence JG, Miesel L. 1996.  
1084 Rearrangements of the Bacterial Chromosome: Formation and  
1085 Applications. In: Neidhardt FC, editor. *Escherichia coli and Salmonella: Cellular and*  
1086 *Molecular Biology*. Washington, D.C.: 2256-2276. p. 2256-2276.
- 1087 Sanjuan R. 2010. Mutational fitness effects in RNA and single-stranded DNA viruses:  
1088 common patterns revealed by site-directed mutagenesis studies. *Philosophical*  
1089 *transactions of the Royal Society of London. Series B, Biological sciences*  
1090 365:1975-1982. <http://dx.doi.org/10.1098/rstb.2010.0063>
- 1091 Sankar TS, Wastuwidyaningtyas BD, Dong Y, Lewis SA, Wang JD. 2016. The nature  
1092 of mutations induced by replication-transcription collisions. *Nature*.  
1093 <http://dx.doi.org/10.1038/nature18316>
- 1094 Sarkisyan KS, Bolotin DA, Meer MV, Usmanova DR, Mishin AS, Sharonov GV,  
1095 Ivankov DN, Bozhanova NG, Baranov MS, Soylemez O, et al. 2016. Local fitness  
1096 landscape of the green fluorescent protein. *Nature* 533:397-401.  
1097 <http://dx.doi.org/10.1038/nature17995>
- 1098 Seier T, Padgett DR, Zilberberg G, Sutera VA, Jr., Toha N, Lovett ST. 2011. Insights  
1099 into mutagenesis using *Escherichia coli* chromosomal lacZ strains that enable  
1100 detection of a wide spectrum of mutational events. *Genetics* 188:247-262.  
1101 <http://dx.doi.org/10.1534/genetics.111.127746>

- 1102 Shewaramani S, Finn TJ, Leahy SC, Kassen R, Rainey PB, Moon CD. 2017.  
1103 Anaerobically Grown Escherichia coli Has an Enhanced Mutation Rate and  
1104 Distinct Mutational Spectra. PLoS genetics 13:e1006570.  
1105 <http://dx.doi.org/10.1371/journal.pgen.1006570>
- 1106 Shindo C, Aranzana MJ, Lister C, Baxter C, Nicholls C, Nordborg M, Dean C. 2005.  
1107 Role of FRIGIDA and FLOWERING LOCUS C in determining variation in  
1108 flowering time of Arabidopsis. Plant physiology 138:1163-1173.  
1109 <http://dx.doi.org/10.1104/pp.105.061309>
- 1110 Silby MW, Cerdano-Tarraga AM, Vernikos GS, Giddens SR, Jackson RW, Preston  
1111 GM, Zhang XX, Moon CD, Gehrig SM, Godfrey SA, et al. 2009. Genomic and  
1112 genetic analyses of diversity and plant interactions of Pseudomonas fluorescens.  
1113 Genome biology 10:R51. <http://dx.doi.org/10.1186/gb-2009-10-5-r51>
- 1114 Simpson GG. 1949. The meaning of evolution : a study of the history of life and of its  
1115 significance for man. New Haven: Yale University Press.
- 1116 Spiers AJ, Bohannon J, Gehrig SM, Rainey PB. 2003. Biofilm formation at the air-  
1117 liquid interface by the Pseudomonas fluorescens SBW25 wrinkly spreader requires  
1118 an acetylated form of cellulose. Molecular Microbiology 50:15-27.
- 1119 Spiers AJ, Kahn SG, Bohannon J, Travisano M, Rainey PB. 2002. Adaptive  
1120 divergence in experimental populations of Pseudomonas fluorescens. I. Genetic  
1121 and phenotypic bases of wrinkly spreader fitness. Genetics 161:33-46.
- 1122 Steinrueck M, Guet CC. 2017. Complex chromosomal neighborhood effects  
1123 determine the adaptive potential of a gene under selection. Elife 6.  
1124 <http://dx.doi.org/10.7554/eLife.25100>

- 1125 Stern DL. 2013. The genetic causes of convergent evolution. *Nature reviews.*
- 1126 *Genetics* 14:751-764. <http://dx.doi.org/10.1038/nrg3483>
- 1127 Stern DL, Orgogozo V. 2009. Is genetic evolution predictable? *Science* 323:746-751.
- 1128 <http://dx.doi.org/10.1126/science.1158997>
- 1129 Stoltzfus A, McCandlish DM. 2017. Mutational Biases Influence Parallel Adaptation.
- 1130 *Molecular biology and evolution* 34:2163-2172.
- 1131 <http://dx.doi.org/10.1093/molbev/msx180>
- 1132 Streisinger G, Owen J. 1985. Mechanisms of spontaneous and induced frameshift
- 1133 mutation in bacteriophage T4. *Genetics* 109:633-659.
- 1134 Sung W, Ackerman MS, Miller SF, Doak TG, Lynch M. 2012. Drift-barrier
- 1135 hypothesis and mutation-rate evolution. *Proceedings of the National Academy of*
- 1136 *Sciences of the United States of America* 109:18488-18492.
- 1137 <http://dx.doi.org/10.1073/pnas.1216223109>
- 1138 Tautz D, Renz M. 1984. Simple sequences are ubiquitous repetitive components of
- 1139 eukaryotic genomes. *Nucleic Acids Res* 12:4127-4138.
- 1140 Tenaillon O, Rodriguez-Verdugo A, Gaut RL, McDonald P, Bennett AF, Long AD,
- 1141 Gaut BS. 2012. The molecular diversity of adaptive convergence. *Science*
- 1142 335:457-461. <http://dx.doi.org/10.1126/science.1212986>
- 1143 Ungerer MC, Linder CR, Rieseberg LH. 2003. Effects of genetic background on
- 1144 response to selection in experimental populations of *Arabidopsis thaliana*. *Genetics*
- 1145 163:277-286.

- 1146 Viswanathan M, Lacirignola JJ, Hurley RL, Lovett ST. 2000. A novel mutational  
1147 hotspot in a natural quasipalindrome in *Escherichia coli*. *J Mol Biol* 302:553-564.  
1148 <http://dx.doi.org/10.1006/jmbi.2000.4088>
- 1149 Wang AD, Sharp NP, Agrawal AF. 2014. Sensitivity of the distribution of mutational  
1150 fitness effects to environment, genetic background, and adaptedness: a case study  
1151 with *Drosophila*. *Evolution* 68:840-853. <http://dx.doi.org/10.1111/evo.12309>
- 1152 Wei W, Ning LW, Ye YN, Li SJ, Zhou HQ, Huang J, Guo FB. 2014. SMAL: A  
1153 Resource of Spontaneous Mutation Accumulation Lines. *Molecular biology and*  
1154 *evolution* 31:1302-1308. <http://dx.doi.org/10.1093/molbev/msu073>
- 1155 Woods R, Schneider D, Winkworth CL, Riley MA, Lenski RE. 2006. Tests of parallel  
1156 molecular evolution in a long-term experiment with *Escherichia coli*. *Proceedings*  
1157 *of the National Academy of Sciences of the United States of America* 103:9107-  
1158 9112. <http://dx.doi.org/10.1073/pnas.0602917103>
- 1159 Xu M, Yang X, Yang XA, Zhou L, Liu TZ, Fan Z, Jiang T. 2016. Structural insights  
1160 into the regulatory mechanism of the *Pseudomonas aeruginosa* YfiB<sup>NR</sup> system.  
1161 *Protein Cell* 7:403-416. <http://dx.doi.org/10.1007/s13238-016-0264-7>
- 1162 Zhao HL, Xia ZK, Zhang FZ, Ye YN, Guo FB. 2015. Multiple Factors Drive  
1163 Replicating Strand Composition Bias in Bacterial Genomes. *Int J Mol Sci*  
1164 16:23111-23126. <http://dx.doi.org/10.3390/ijms160923111>
- 1165 Zhen Y, Aardema ML, Medina EM, Schumer M, Andolfatto P. 2012. Parallel  
1166 molecular evolution in an herbivore community. *Science* 337:1634-1637.  
1167 <http://dx.doi.org/10.1126/science.1226630>  
1168

1169 **Figure supplements**

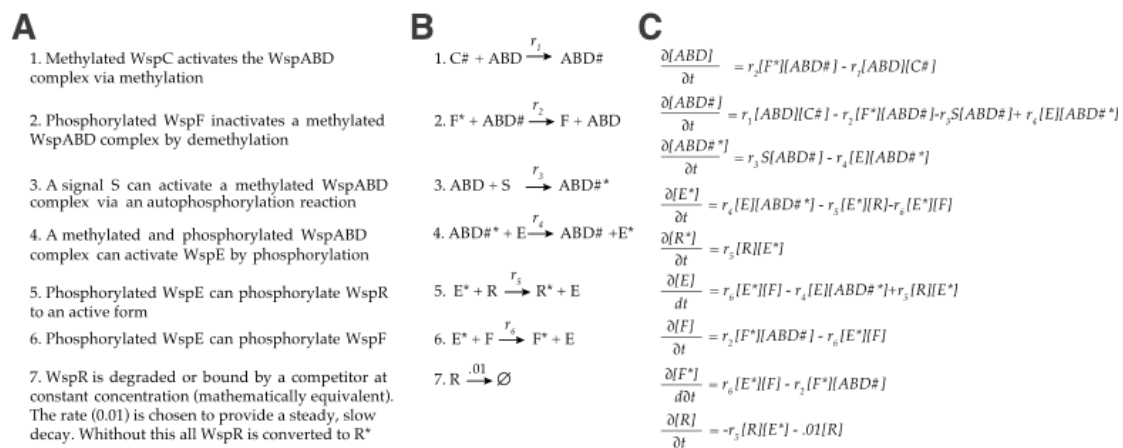

1170

1171 **Figure 3 - figure supplement 1. Wsp model (A)** Description of functional

1172 interactions **(B)** Description of molecular reaction **(C)** Differential equations

1173 describing the dynamics of the Wsp pathway. The activity of WspA is modulated by

1174 methylation, where it is activated by the CheR-like methyltransferase WspC

1175 (PFLU1221). The CheB-like methylesterase WspF (PFLU1224) functions as a

1176 negative regulator. Modulation of WspR activity through changes in oligomerization

1177 state and clustering is not explicitly included in the model (De, et al. 2008;

1178 Huangyutitham, et al. 2013), but can be interpreted as changes in the rate of WspR

1179 activation.

1180

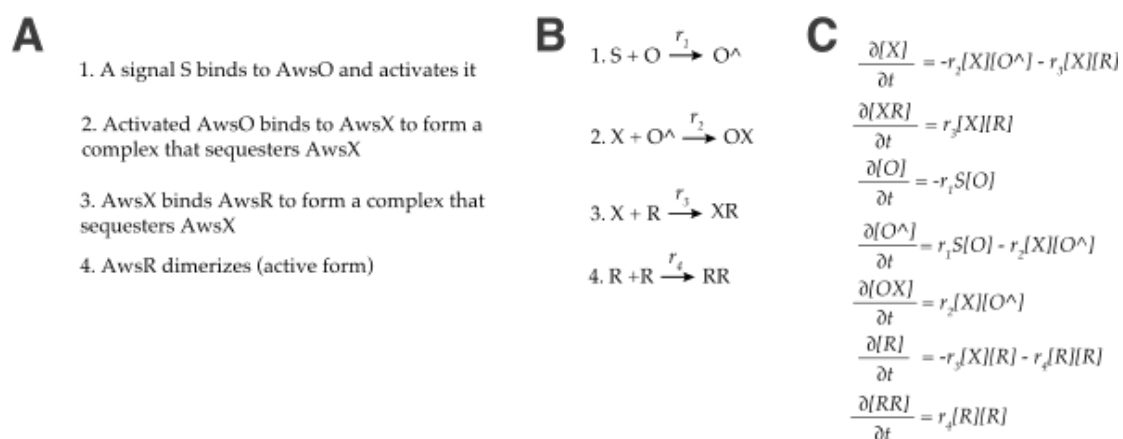

1181

1182 **Figure 3 - figure supplement 2. Aws model (A)** Description of functional

1183 interactions **(B)** Description of molecular reaction **(C)** Differential equations

1184 describing the dynamics of the Aws pathway. Release of AwsX mediated repression

1185 results in a conformational shift that in the model is represented as formation of an

1186 active dimer.

1187

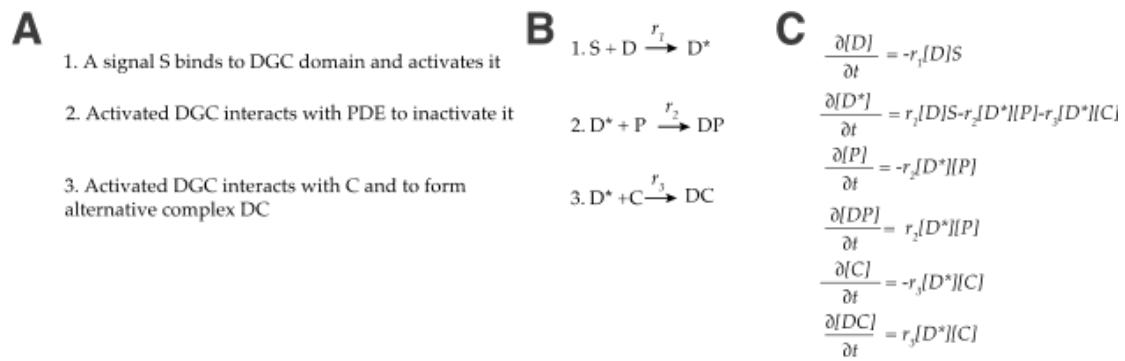

1188

1189 **Figure 3 - figure supplement 3. Mws model (A)** Description of functional

1190 interactions **(B)** Description of molecular reaction **(C)** Differential equations

1191 describing the dynamics of the Aws pathway

1192

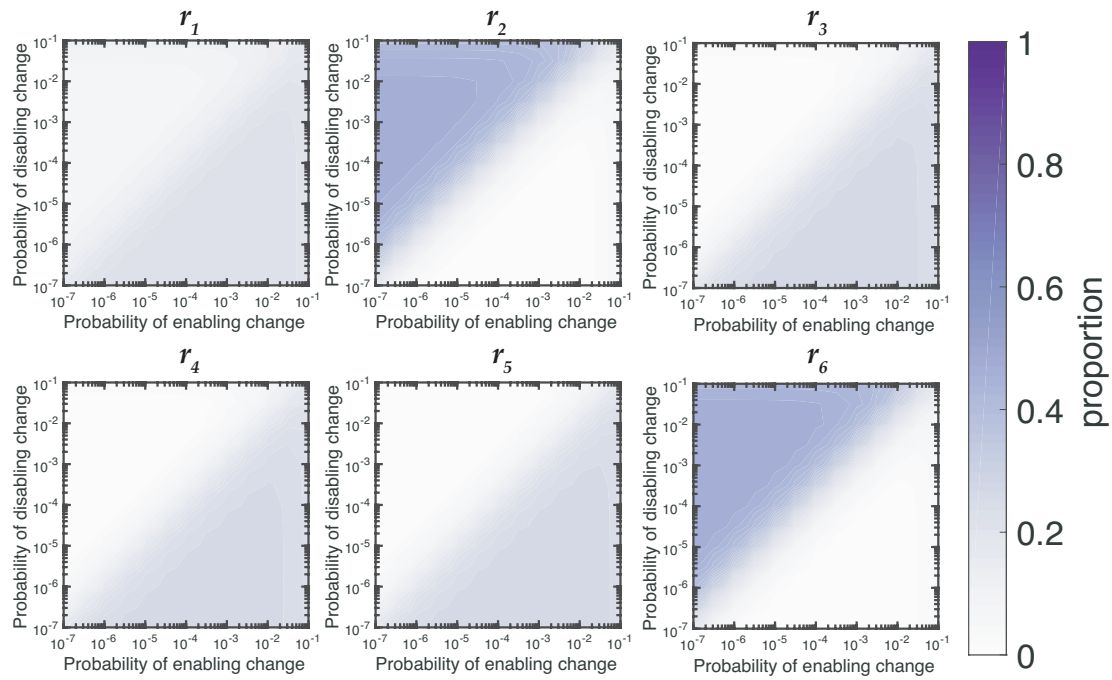

1193

1194 **Figure 4 - figure supplement 1. Relative contributions of reaction rates for Wsp**

1195

1196

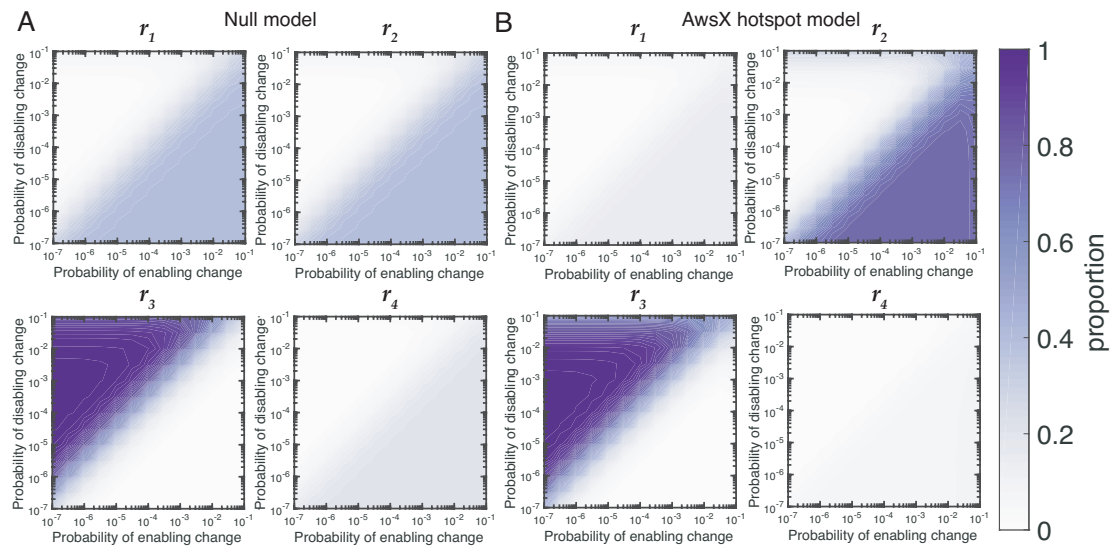

1197

1198 **Figure 4 - figure supplement 2. Relative contributions of reaction rates for Aws.**

1199 Effect of the mutational hotspot on the relative contribution of each reaction in Aws  
 1200 to the probability of generating a wrinkly spreader (A) Null model. (B) Hot spot in  
 1201 AwsX increase rate mutation rate five times. Because the mutational hotspot increases  
 1202 the likelihood that AwsX's reactions will be altered,  $r_2$  and  $r_3$  have an increased  
 1203 probability of enabling or disabling change. As a consequence,  $r_2$  shows the biggest  
 1204 change as it contributes up to 70% (as opposed to 35% without the mutational  
 1205 hotspot) of the probability that Aws is used to generate a WS in the area where

1206 enabling change is more likely than disabling change. Furthermore, in the other area  
1207 of parameter space where disabling change is more likely,  $r_3$  contributes up to 90% of  
1208 the probability that Aws is used with or without the hotspot.

1209

1210 **Supplementary files**

1211 Figure S1

1212 Figure 5 – source data 1. Table of all WS mutations in Wsp, Aws and Mws.

1213 ODE model and code



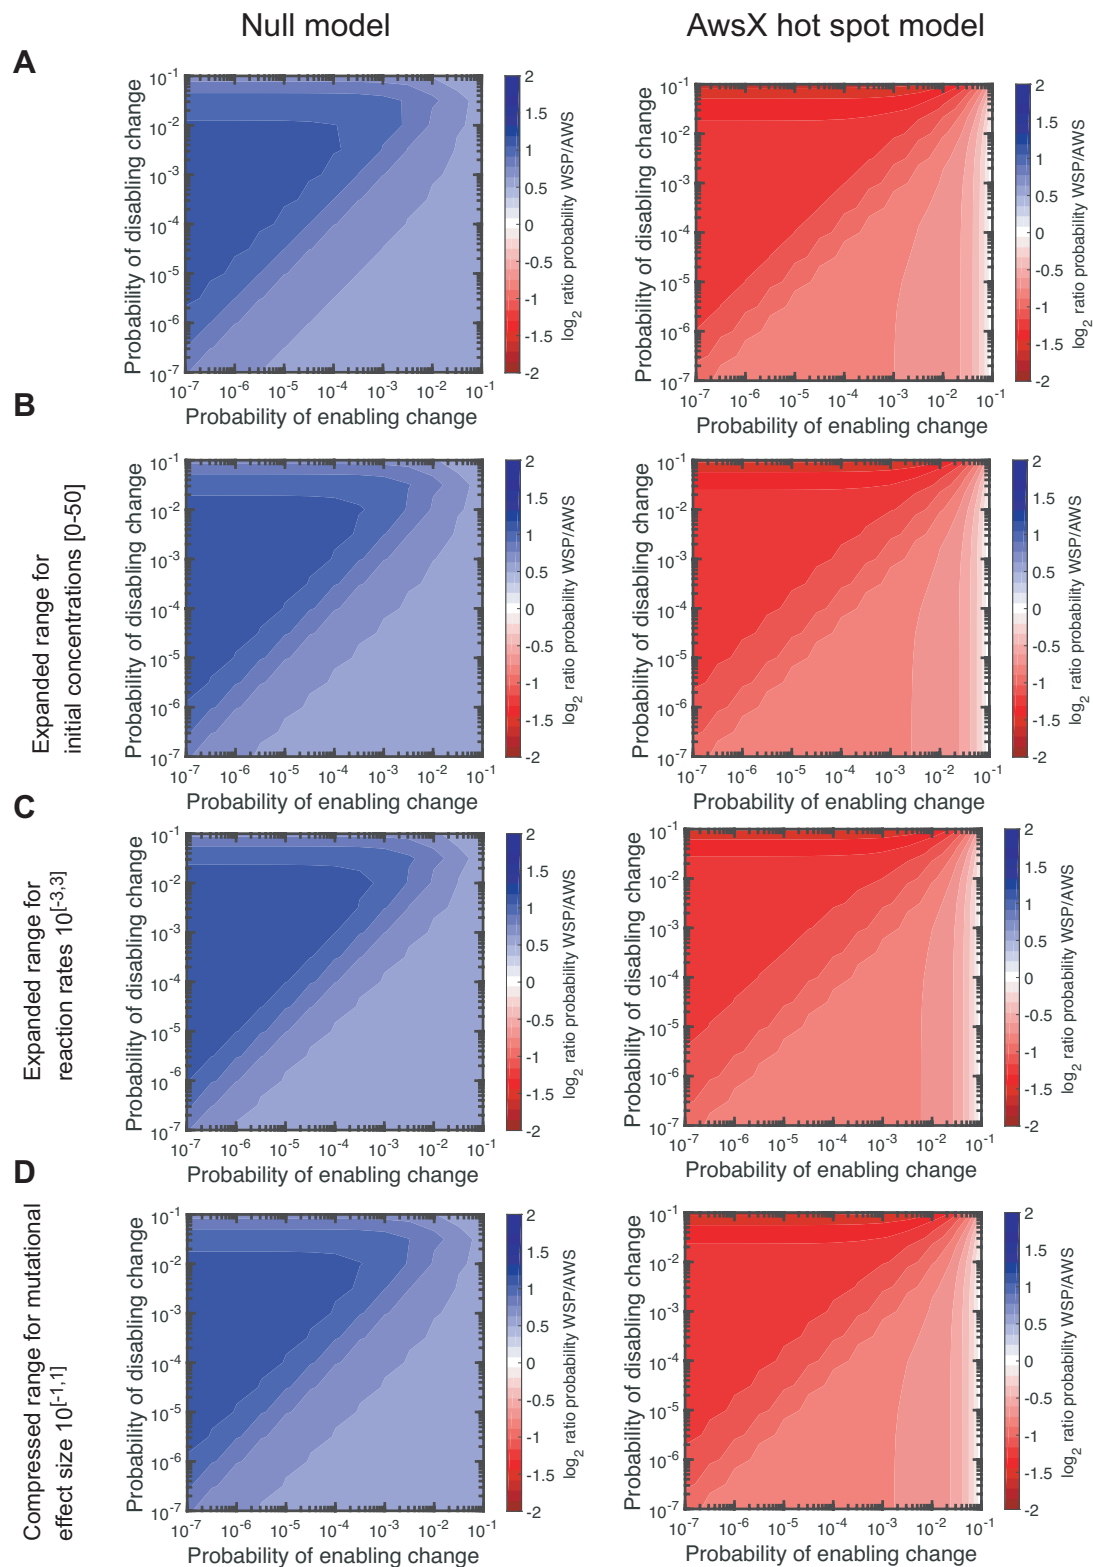

**Figure S1. Parameter sensitivity analysis.** To assess the effect of the chosen parameter (A) ranges on our results, we redid our sampling procedure for WSP for three different parameter regimes: (B) an expanded range for initial concentrations [0-50], (C) an expanded range for reaction rates  $10^{[-3,3]}$ , (D) a compressed range for mutational effect size  $10^{[-1,1]}$ . We found that our qualitative results are robust to these changes.

**Figure 5 - Source data - Wsp mutations**

| Genome position   | Type         | Change     | Gene position | Gene locus | Gene symbol   | Effect                                 | Comment                   | Proposed molecular effect            |
|-------------------|--------------|------------|---------------|------------|---------------|----------------------------------------|---------------------------|--------------------------------------|
| 1353597 - 1353602 | Deletion     | del 6 bp   | 1328 - 1333   | PFLU1219   | <i>wspA</i>   | In frame del G443 - M444)              | No homology               |                                      |
| 1353112 - 1353195 | Deletion     | del 84 bp  | 843 - 926     | PFLU1219   | <i>wspA</i>   | In frame del A281-A308                 | 6 bp GGCCAC homology      | methylation site                     |
| 1353112 - 1353195 | Deletion     | del 84 bp  | 843 - 926     | PFLU1219   | <i>wspA</i>   | In frame del A281-A308                 | 6 bp GGCCAC homology      | methylation site                     |
| 1353140 - 1353160 | Deletion     | del 21 bp  | 878 - 898     | PFLU1219   | <i>wspA</i>   | In frame del T293 - E299               | 5 bp ACTGA homology       | methylation site                     |
| 1353140 - 1353160 | Deletion     | del 21 bp  | 878 - 898     | PFLU1219   | <i>wspA</i>   | In frame del T293 - E299               | 5 bp ACTGA homology       | methylation site                     |
| 1353423           | Transversion | A->C       | 1154          | PFLU1219   | <i>wspA</i>   | N385T                                  |                           | trimer-of-dimer association          |
| 1353451           | Transversion | A->C       | 1182          | PFLU1219   | <i>wspA</i>   | E394D                                  |                           | trimer-of-dimer association          |
| 1353451           | Transversion | A->C       | 1182          | PFLU1219   | <i>wspA</i>   | E394D                                  |                           | trimer-of-dimer association          |
| 1353411           | Transition   | C->T       | 1142          | PFLU1219   | <i>wspA</i>   | A381V                                  |                           | trimer-of-dimer association          |
| 1353411           | Transition   | C->T       | 1142          | PFLU1219   | <i>wspA</i>   | A381V                                  |                           | trimer-of-dimer association          |
| 1353528           | Transition   | C->T       | 1259          | PFLU1219   | <i>wspA</i>   | A420V                                  |                           | possible trimer-of-dimer association |
| 1353528           | Transition   | C->T       | 1259          | PFLU1219   | <i>wspA</i>   | A420V                                  |                           | possible trimer-of-dimer association |
| 1353323           | Transition   | G->A       | 1054          | PFLU1219   | <i>wspA</i>   | A352T                                  |                           | possible trimer-of-dimer association |
| 1353323           | Transition   | G->A       | 1054          | PFLU1219   | <i>wspA</i>   | A352T                                  |                           | possible trimer-of-dimer association |
| 1353408           | Transversion | T->G       | 1139          | PFLU1219   | <i>wspA</i>   | V380G                                  |                           | trimer-of-dimer association          |
| 1355373 - 1355707 | Deletion     | del 309 bp | 973 - 51      | PFLU1221   | <i>wspC/D</i> | WspC M1-A324 fused to<br>WspD D18-S232 | 9 bp ACCCTGGCC homology   | increase wspC activity               |
| 1358267           | Transversion | A->C       | 1916          | PFLU1223   | <i>wspE</i>   | D639A                                  |                           | disrupt phoshorylation site of wspF  |
| 1358267           | Transversion | A->C       | 1916          | PFLU1223   | <i>wspE</i>   | D639A                                  |                           | disrupt phoshorylation site of wspF  |
| 1358267           | Transversion | A->C       | 1916          | PFLU1223   | <i>wspE</i>   | D639A                                  |                           | disrupt phoshorylation site of wspF  |
| 1358267           | Transversion | A->C       | 1916          | PFLU1223   | <i>wspE</i>   | D639A                                  |                           | disrupt phoshorylation site of wspF  |
| 1358267           | Transversion | A->C       | 1916          | PFLU1223   | <i>wspE</i>   | D639A                                  |                           | disrupt phoshorylation site of wspF  |
| 1358551           | Transition   | A->G       | 2200          | PFLU1223   | <i>wspE</i>   | K734E                                  |                           | disrupt phoshorylation site of wspF  |
| 1358553           | Transversion | A->C       | 2202          | PFLU1223   | <i>wspE</i>   | K734N                                  |                           | disrupt phoshorylation site of wspF  |
| 1358553           | Transversion | A->C       | 2202          | PFLU1223   | <i>wspE</i>   | K734N                                  |                           | disrupt phoshorylation site of wspF  |
| 1358553           | Transversion | A->C       | 2202          | PFLU1223   | <i>wspE</i>   | K734N                                  |                           | disrupt phoshorylation site of wspF  |
| 1358270           | Transition   | C->T       | 1919          | PFLU1223   | <i>wspE</i>   | S640L                                  |                           | disrupt phoshorylation site of wspF  |
| 1358266           | Transversion | G->T       | 1915          | PFLU1223   | <i>wspE</i>   | D639Y                                  |                           | disrupt phoshorylation site of wspF  |
| 1358279           | Transversion | T->A       | 1928          | PFLU1223   | <i>wspE</i>   | V643E                                  |                           | disrupt phoshorylation site of wspF  |
| 1358279           | Transversion | T->A       | 1928          | PFLU1223   | <i>wspE</i>   | V643E                                  |                           | disrupt phoshorylation site of wspF  |
| 1358766 - 1358780 | Deletion     | del 15 bp  | 151-165       | PFLU1224   | <i>wspF</i>   | In frame del L51- I55                  | 10 bp GGACCTGATC homology | disrupt demethylase activity         |
| 1358766 - 1358780 | Deletion     | del 15 bp  | 151-165       | PFLU1224   | <i>wspF</i>   | In frame del L51- I55                  | 10 bp GGACCTGATC homology | disrupt demethylase activity         |
| 1358810 - 1358935 | Deletion     | del 126 bp | 195 - 320     | PFLU1224   | <i>wspF</i>   | In frame del R66 -L107                 | No homology               | disrupt demethylase activity         |
| 1359285 - 1359289 | Deletion     | del 5 bp   | 670 - 674     | PFLU1224   | <i>wspF</i>   | Frame shift after L223                 | 3 bp GGC homology         | disrupt demethylase activity         |
| 1359292 - 1359441 | Deletion     | del 150 bp | 677 - 826     | PFLU1224   | <i>wspF</i>   | In frame del T226-G275                 | 3 bp ACC homology         | disrupt demethylase activity         |
| 1359505           | Transition   | A->G       | 890           | PFLU1224   | <i>wspF</i>   | Q297R                                  |                           | disrupt demethylase activity         |

|                   |              |           |           |          |             |                          |             |                                         |
|-------------------|--------------|-----------|-----------|----------|-------------|--------------------------|-------------|-----------------------------------------|
| 1358755           | Transition   | C->T      | 140       | PFLU1224 | <i>wspF</i> | P47L                     |             | disrupt demethylase activity            |
| 1359091           | Transition   | C->T      | 476       | PFLU1224 | <i>wspF</i> | S159L                    |             | disrupt demethylase activity            |
| 1359171           | Transition   | C->T      | 556       | PFLU1224 | <i>wspF</i> | H186Y                    |             | disrupt demethylase activity            |
| 1359538           | Transition   | C->T      | 923       | PFLU1224 | <i>wspF</i> | P308L                    |             | disrupt demethylase activity            |
| 1359423           | Transversion | G->C      | 808       | PFLU1224 | <i>wspF</i> | G270R                    |             | disrupt demethylase activity            |
| 1359604           | Transversion | T->A      | 989       | PFLU1224 | <i>wspF</i> | L331*                    |             | disrupt demethylase activity            |
| 1360156 - 1360167 | Deletion     | del 12 bp | 481 - 492 | PFLU1225 | <i>wspR</i> | In frame del N161 - L164 | No homology | disrupt requirement for phosphorylation |
| 1360099           | Transversion | C->A      | 424       | PFLU1225 | <i>wspR</i> | Q142K                    |             | disrupt requirement for phosphorylation |
| 1360102           | Transition   | C->T      | 427       | PFLU1225 | <i>wspR</i> | R143W                    |             | disrupt requirement for phosphorylation |
| 1360102           | Transition   | C->T      | 427       | PFLU1225 | <i>wspR</i> | R143W                    |             | disrupt requirement for phosphorylation |
| 1360107           | Transversion | T->G      | 432       | PFLU1225 | <i>wspR</i> | D144E                    |             | disrupt requirement for phosphorylation |

**Figure 5 - Source data - Aws mutations**

| Genome position | Type         | Change    | Gene position | Gene locus | Gene symbol | Effect      | Comment                   | Proposed molecular effect |
|-----------------|--------------|-----------|---------------|------------|-------------|-------------|---------------------------|---------------------------|
| 5705729         | Transversion | A->C      | 101           | PFLU5209   | <i>awsO</i> | Q34P        |                           | change binding with awsX  |
| 5705711         | Transversion | A->C      | 119           | PFLU5209   | <i>awsO</i> | Q40P        |                           | change binding with awsX  |
| 5706522         | Transition   | C->T      | 575           | PFLU5210   | <i>awsR</i> | A192V       |                           | HAMP linker               |
| 5706522         | Transition   | C->T      | 575           | PFLU5210   | <i>awsR</i> | A192V       |                           | HAMP linker               |
| 5706909         | Transition   | C->T      | 188           | PFLU5210   | <i>awsR</i> | A63V        |                           | interaction awsX          |
| 5706441         | Transversion | A->C      | 656           | PFLU5210   | <i>awsR</i> | D219A       |                           | HAMP linker               |
| 5706937         | Transition   | C->T      | 160           | PFLU5210   | <i>awsR</i> | R54C        |                           | interaction awsX          |
| 5707018         | Transversion | A->C      | 79            | PFLU5210   | <i>awsR</i> | T27P        |                           | disrupt TM helix          |
| 5707018         | Transversion | A->C      | 79            | PFLU5210   | <i>awsR</i> | T27P        |                           | disrupt TM helix          |
| 5707018         | Transversion | A->C      | 79            | PFLU5210   | <i>awsR</i> | T27P        |                           | disrupt TM helix          |
| 5707018         | Transversion | A->C      | 79            | PFLU5210   | <i>awsR</i> | T27P        |                           | disrupt TM helix          |
| 5707018         | Transversion | A->C      | 79            | PFLU5210   | <i>awsR</i> | T27P        |                           | disrupt TM helix          |
| 5707018         | Transversion | A->C      | 79            | PFLU5210   | <i>awsR</i> | T27P        |                           | disrupt TM helix          |
| 5707018         | Transversion | A->C      | 79            | PFLU5210   | <i>awsR</i> | T27P        |                           | disrupt TM helix          |
| 5707018         | Transversion | A->C      | 79            | PFLU5210   | <i>awsR</i> | T27P        |                           | disrupt TM helix          |
| 5707018         | Transversion | A->C      | 79            | PFLU5210   | <i>awsR</i> | T27P        |                           | disrupt TM helix          |
| 5707574         | Transition   | C->T      | 92            | PFLU5211   | <i>awsX</i> | A31V        |                           | disrupt awsX function     |
| 5707528-5707566 | Deletion     | del 39 bp | 100-138       | PFLU5211   | <i>awsX</i> | del P34-A46 | 10 bp homology CGCCCAGGCG | disrupt awsX function     |
| 5707528-5707566 | Deletion     | del 39 bp | 100-138       | PFLU5211   | <i>awsX</i> | del P34-A46 | 10 bp homology CGCCCAGGCG | disrupt awsX function     |
| 5707460         | Transversion | T->G      | 206           | PFLU5211   | <i>awsX</i> | L69R        |                           | disrupt awsX function     |
| 5707405-5707437 | Deletion     | del 33 bp | 229-261       | PFLU5211   | <i>awsX</i> | del Y77-Q87 | 6 bp homology ACCCAG      | disrupt awsX function     |
| 5707405-5707437 | Deletion     | del 33 bp | 229-261       | PFLU5211   | <i>awsX</i> | del Y77-Q87 | 6 bp homology ACCCAG      | disrupt awsX function     |
| 5707405-5707437 | Deletion     | del 33 bp | 229-261       | PFLU5211   | <i>awsX</i> | del Y77-Q87 | 6 bp homology ACCCAG      | disrupt awsX function     |
| 5707405-5707437 | Deletion     | del 33 bp | 229-261       | PFLU5211   | <i>awsX</i> | del Y77-Q87 | 6 bp homology ACCCAG      | disrupt awsX function     |

|                 |              |           |         |          |             |             |                      |                              |
|-----------------|--------------|-----------|---------|----------|-------------|-------------|----------------------|------------------------------|
| 5707405-5707437 | Deletion     | del 33 bp | 229-261 | PFLU5211 | <i>awsX</i> | del Y77-Q87 | 6 bp homology ACCCAG | disrupt <i>awsX</i> function |
| 5707405-5707437 | Deletion     | del 33 bp | 229-261 | PFLU5211 | <i>awsX</i> | del Y77-Q87 | 6 bp homology ACCCAG | disrupt <i>awsX</i> function |
| 5707405-5707437 | Deletion     | del 33 bp | 229-261 | PFLU5211 | <i>awsX</i> | del Y77-Q87 | 6 bp homology ACCCAG | disrupt <i>awsX</i> function |
| 5707405-5707437 | Deletion     | del 33 bp | 229-261 | PFLU5211 | <i>awsX</i> | del Y77-Q87 | 6 bp homology ACCCAG | disrupt <i>awsX</i> function |
| 5707405-5707437 | Deletion     | del 33 bp | 229-261 | PFLU5211 | <i>awsX</i> | del Y77-Q87 | 6 bp homology ACCCAG | disrupt <i>awsX</i> function |
| 5707405-5707437 | Deletion     | del 33 bp | 229-261 | PFLU5211 | <i>awsX</i> | del Y77-Q87 | 6 bp homology ACCCAG | disrupt <i>awsX</i> function |
| 5707405-5707437 | Deletion     | del 33 bp | 229-261 | PFLU5211 | <i>awsX</i> | del Y77-Q87 | 6 bp homology ACCCAG | disrupt <i>awsX</i> function |
| 5707405-5707437 | Deletion     | del 33 bp | 229-261 | PFLU5211 | <i>awsX</i> | del Y77-Q87 | 6 bp homology ACCCAG | disrupt <i>awsX</i> function |
| 5707405-5707437 | Deletion     | del 33 bp | 229-261 | PFLU5211 | <i>awsX</i> | del Y77-Q87 | 6 bp homology ACCCAG | disrupt <i>awsX</i> function |
| 5707405-5707437 | Deletion     | del 33 bp | 229-261 | PFLU5211 | <i>awsX</i> | del Y77-Q87 | 6 bp homology ACCCAG | disrupt <i>awsX</i> function |
| 5707405-5707437 | Deletion     | del 33 bp | 229-261 | PFLU5211 | <i>awsX</i> | del Y77-Q87 | 6 bp homology ACCCAG | disrupt <i>awsX</i> function |
| 5707405-5707437 | Deletion     | del 33 bp | 229-261 | PFLU5211 | <i>awsX</i> | del Y77-Q87 | 6 bp homology ACCCAG | disrupt <i>awsX</i> function |
| 5707405-5707437 | Deletion     | del 33 bp | 229-261 | PFLU5211 | <i>awsX</i> | del Y77-Q87 | 6 bp homology ACCCAG | disrupt <i>awsX</i> function |
| 5707405-5707437 | Deletion     | del 33 bp | 229-261 | PFLU5211 | <i>awsX</i> | del Y77-Q87 | 6 bp homology ACCCAG | disrupt <i>awsX</i> function |
| 5707405-5707437 | Deletion     | del 33 bp | 229-261 | PFLU5211 | <i>awsX</i> | del Y77-Q87 | 6 bp homology ACCCAG | disrupt <i>awsX</i> function |
| 5707262         | Transversion | T->G      | 404     | PFLU5211 | <i>awsX</i> | L135R       |                      | disrupt <i>awsX</i> function |

**Figure 5 - Source data - Mws mutations**

| Genome position    | Type         | Change        | Gene positio | Gene locus | Gene symbol | Effect            | Comment                | Proposed molecular effect              |
|--------------------|--------------|---------------|--------------|------------|-------------|-------------------|------------------------|----------------------------------------|
| 5857733-5857741    | Deletion     | del 9 bp      | 3071-3079    | PFLU5329   | <i>mwsR</i> | del R1024 - E1026 | 8 bp homology CCTGGAGC | Disrupt interaction DGC and EAL domain |
| 5857733-5857741    | Deletion     | del 9 bp      | 3071-3079    | PFLU5329   | <i>mwsR</i> | del R1024 - E1026 | 8 bp homology CCTGGAGC | Disrupt interaction DGC and EAL domain |
| 5857733-5857741    | Deletion     | del 9 bp      | 3071-3079    | PFLU5329   | <i>mwsR</i> | del R1024 - E1026 | 8 bp homology CCTGGAGC | Disrupt interaction DGC and EAL domain |
| 5857733-5857741    | Deletion     | del 9 bp      | 3071-3079    | PFLU5329   | <i>mwsR</i> | del R1024 - E1026 | 8 bp homology CCTGGAGC | Disrupt interaction DGC and EAL domain |
| 5857733-5857741    | Deletion     | del 9 bp      | 3071-3079    | PFLU5329   | <i>mwsR</i> | del R1024 - E1026 | 8 bp homology CCTGGAGC | Disrupt interaction DGC and EAL domain |
| 5857733-5857741    | Deletion     | del 9 bp      | 3071-3079    | PFLU5329   | <i>mwsR</i> | del R1024 - E1026 | 8 bp homology CCTGGAGC | Disrupt interaction DGC and EAL domain |
| 5857733-5857741    | Deletion     | del 9 bp      | 3071-3079    | PFLU5329   | <i>mwsR</i> | del R1024 - E1026 | 8 bp homology CCTGGAGC | Disrupt interaction DGC and EAL domain |
| 5857733-5857741    | Deletion     | del 9 bp      | 3071-3079    | PFLU5329   | <i>mwsR</i> | del R1024 - E1026 | 8 bp homology CCTGGAGC | Disrupt interaction DGC and EAL domain |
| 5857733-5857741    | Deletion     | del 9 bp      | 3071-3079    | PFLU5329   | <i>mwsR</i> | del R1024 - E1026 | 8 bp homology CCTGGAGC | Disrupt interaction DGC and EAL domain |
| 5857733-5857741    | Deletion     | del 9 bp      | 3071-3079    | PFLU5329   | <i>mwsR</i> | del R1024 - E1026 | 8 bp homology CCTGGAGC | Disrupt interaction DGC and EAL domain |
| A5857192C          | Transversion | A->C          | A2530C       | PFLU5329   | <i>mwsR</i> | I844L             |                        |                                        |
| C5857598/ C5857599 | Insertion    | duplication 2 | 2937-2959    | PFLU5329   | <i>mwsR</i> | dup I978-G985     |                        | Disrupt interaction DGC and EAL domain |
| G5857440A          | Transition   | G->A          | G2778A       | PFLU5329   | <i>mwsR</i> | M926I             |                        | Disrupt interaction M992               |
| G5857440A          | Transition   | G->A          | G2778A       | PFLU5329   | <i>mwsR</i> | M926I             |                        | Disrupt interaction M926               |
| G5857440A          | Transition   | G->A          | G2778A       | PFLU5329   | <i>mwsR</i> | M926I             |                        | Disrupt interaction M926               |
| G5857638A          | Transition   | G->A          | G2976A       | PFLU5329   | <i>mwsR</i> | M992I             |                        | Disrupt interaction M926               |
| G5857909A          | Transition   | G->A          | G3247A       | PFLU5329   | <i>mwsR</i> | E1083K            |                        | Disrupt interaction DGC and EAL domain |

## Differential equations for WSP, AWS, & MWS pathways

### WSP

$$\begin{aligned}\frac{d[ABD]}{dt} &= r_2F^*[ABDm] - r_1[ABD][Cm] \\ \frac{d[ABDm]}{dt} &= r_1[ABD][Cm] - r_2F^*[ABDm] - r_3S[ABDm] + r_4E[ABDm^*] \\ \frac{d[ABDm^*]}{dt} &= -r_4E[ABDm^*] + r_3S[ABDm] \\ \frac{dE^*}{dt} &= r_4E[ABDm^*] - r_5E^*R - r_6E^*F \\ \frac{dR^*}{dt} &= r_5RE^* \\ \frac{dE}{dt} &= r_6E^*F - r_4E[ABDm^*] + r_5RE^* \\ \frac{dF}{dt} &= -r_6E^*F + r_2F^*[ABDm] \\ \frac{dF^*}{dt} &= r_6E^*F - r_2F^*[ABDm] \\ \frac{dR}{dt} &= -r_5RE^* - .01R\end{aligned}$$

### AWS

$$\begin{aligned}\frac{dX}{dt} &= -r_2XO^* - r_3XR \\ \frac{d[XR]}{dt} &= r_3XR \\ \frac{dO}{dt} &= -r_1SO \\ \frac{dO^*}{dt} &= r_1SO - r_2XO^* \\ \frac{d[OX]}{dt} &= r_2O^*X \\ \frac{dR}{dt} &= -r_3XR - r_4RR \\ \frac{d[RR]}{dt} &= r_4RR\end{aligned}$$

## MWS

$$\begin{aligned}\frac{dG}{dt} &= -r_1GS \\ \frac{dG^*}{dt} &= r_1GS - r_2G^*E - r_3G^*C \\ \frac{dE}{dt} &= -r_2G^*E \\ \frac{d[GE]}{dt} &= r_2G^*E \\ \frac{dC}{dt} &= -r_3G^*C \\ \frac{d[GC]}{dt} &= r_3G^*C\end{aligned}$$

## Julia code for WSP, AWS, and MWS differential equations

The following three functions implement the differential equation model (ODE model) for the WSP, AWS, and MWS pathways.

```
using ODE,StatsBase,MAT,HDF5,JLD

# code for WSP differential equations
function lindodeWSP(t,y)
    # convert y to reactants for ease of reading
    ABD=y[1];
    ABDm=y[2];
    ABDmp=y[3];
    Ep=y[4];
    Rp=y[5];
    E=y[6];
    F=y[7];
    Fp=y[8];
    R=y[9];
    # pull reaction rates from rs variable
    r1=rs[1];r2=rs[2];r3=rs[3];r4=rs[4];r5=rs[5];r6=rs[6];
    # compute derivatives, i.e. y'
    yp=zeros(size(y));
    yp[1]=r2*Fp*ABDm-r1*ABD*Cm; # dABD/dt
    yp[2]=r1*ABD*Cm-r2*Fp*ABDm-r3*S*ABDm+r4*E*ABDmp; # dABDm/dt
    yp[3]=-r4*E*ABDmp + r3*S*ABDm ; # dABDmp/dt
    yp[4]=r4*E*ABDmp - r5*Ep*R -r6*Ep*F ; # dEp/dt
    yp[5]=r5*R*Ep ; # dRp/dt
    yp[6]=r6*Ep*F-r4*E*ABDmp+r5*R*Ep ; # dE/dt
    yp[7]=-r6*Ep*F +r2*Fp*ABDm ; # dF/dt
    yp[8]=r6*Ep*F -r2*Fp*ABDm ; # dFp/dt
    yp[9]=-r5*R*Ep-.01*R; # dR/dt
    return yp
end

# code for AWS differential equations
```

```

function lindodeAWS(t,y)
    # convert y to reactants for ease of reading
    X=y[1];
    XR=y[2];
    O=y[3];
    Op=y[4];
    OX=y[5];
    R=y[6];
    RR=y[7];
    # pull reaction rates from rs variable
    r1=rs[1];r2=rs[2];r3=rs[3];r4=rs[4];
    # compute derivatives, i.e. y'
    yp=zeros(size(y));
    yp[1]=-r2*X*Op-r3*X*R; # dX/dt
    yp[2]=r3*X*R; # dXR/dt
    yp[3]=-r1*S*0; # dO/dt
    yp[4]=r1*S*0-r2*X*Op; # dOp/dt
    yp[5]=r2*Op*X; # dOX/dt
    yp[6]=-r3*X*R-r4*R*R; # dR/dt
    yp[7]=r4*R*R; # dRR/dt
    return yp;
end

# code for MWS differential equations
function lindodeMWS(t,y)
    # convert y to reactants for ease of reading
    G=y[1];
    Gp=y[2];
    E=y[3];
    GE=y[4];
    C=y[5];
    GC=y[6];
    # pull reaction rates from rs variable
    r1=rs[1];r2=rs[2];r3=rs[3];
    # compute derivatives, i.e. y'
    yp=zeros(size(y));
    yp[1]=-r1*G*S; # dG/dt
    yp[2]=r1*G*S-r2*Gp*E-r3*Gp*C;# dGp/dt
    yp[3]= -r2*Gp*E;# dE/dt
    yp[4]= r2*Gp*E;# dGE/dt
    yp[5]=-r3*Gp*C;# dC/dt
    yp[6]=r3*Gp*C; # dGC/dt
    return yp;
end

```

## Julia code for running differential equation solvers

We include the code for implementing our Bayesian sampling method. The colored sections correspond to statements that make it specific to WSP (blue), AWS (red), or MWS (green). It was run in julia version 0.4.3.

```

# Variables for reactions
numrxns=6; # number of reaction rates for WSP

```

```

numrxns=4; # number of reaction rates for AWS
numrxns=3; # number of reaction rates for MWS
rs=rand(numrxns); # establish variable scope, will be reaction rates later
rs_save=copy(rs); # establish variable scope, will be a saved version of reaction rates later
totnumruns=3.*length(rs); # all possible combinations for reaction rates (down,nothing, up)
v=zeros(length(rs)); # establish variable scope (used to alter reaction rates)
S=0;Cm=0; # initialize constants used in differential equations
indexWS=5; # reactant corresponding to WS in WSP
indexWS=7; # reactant corresponding to WS in AWS
indexWS=6; # reactant corresponding to WS in MWS

# Variables for running ODE solver
testnums=1000; # number of runs
yorig=zeros(testnums); # storage for baseline WS production
yout=0; # establish variable scope
tf=1.0; # establish variable scope
tftimes=1.0; # establish variable scope

numreactants=9; # number of reactants
numreactants=7; # number of reactants
numreactants=6; # number of reactants
init=10*rand(numreactants); # establish variable scope

# Variables for storing data
res=-1*ones(totnumruns,testnums); # storage for altered WS production
numfinished=1; # counter for runs completed

# Code for Bayesian sampling method
while numfinished<=testnums
    done=0;
    try
        println(numfinished) # keeps track of how many sims have been done
        # Sample concentrations and rates to establish a baseline amount of WS production
        rs=10.^(4*rand(numrxns)-2); # sample reaction rates from [.01,100]
        rs_save=copy(rs); # saved copy as a reference when altering later
        init=10*rand(numreactants); # sample initial concentrations for reactants from [0,10]
        S=10*rand(); # sample initial concentration for constant reactant of signal (S) from [0,10]
        Cm=10*rand(); # sample initial concentration for constant reactant Cm from [0,10]

        # ODE solver for baseline
        tf=1.0; # initial time for ode solver
        dst=100; # initial distance, used to determine solution converged
        tol=10^(-8.0); # tolerance for ODE solver
        while dst>tol
            tout, yout = ode45(lindodeWSP, init, [0.0 ,tf]);
            tout, yout = ode45(lindodeAWS, init, [0.0 ,tf]);
            tout, yout = ode45(lindodeMWS, init, [0.0 ,tf]);
            dst=sum((yout[end-1]-yout[end]).^2); # Euclidean distance in final step of solution
            yorig[numfinished]=yout[end][indexWS]; # reactant corresponding to WS
            tftimes=tout[end]; # final time
            tf*=2;
        end
        done=1; # successful completion of try loop
    end
    if done==1 # baseline WS production is established, now sample changes/mutations
        i0=1; # counter for completed changes
        cct=0; # counter for total number of attempts
    end
end

```



```

while i0<=totnumruns;
    cct+=1;
    println([numfinished cct]) # report status for tracking progress
    # Alter reaction rates
    num=i0-1; # used for determining which rates change down/none/up
    for i1=length(rs)-1:-1:0;
        v[i1+1]=floor(num/(3^i1)); # v is num into base 3 number
        num=num-v[i1+1]*3^i1;
    end
    v+=1;
    facs=[10.^(-2*rand()), 1, 10.^(2*rand())]; # factors to alter rxn rates [.01,1] down, 1 none, [1,100] up
    for i1=1:length(rs)
        rs[i1]=facs[v[i1]]*rs_save[i1]; # alter reaction rates
    end
    try
        tout, yout = ode45(lindodeWSP, init, [0.0,tftimes]);
        tout, yout = ode45(lindodeAWS, init, [0.0,tftimes]);
        tout, yout = ode45(lindodeMWS, init, [0.0,tftimes]);
        if abs(tout[end]-tftimes)<.01 # ODE solver finished
            res[i0,numfinished]=yout[end][indexWS]; # store amount of WS produced
            i0+=1
        end
    end
    if cct>10000
        i0=2*totnumruns; # baseline and sampling occurred in space with poorly conditioned ODEs, try again
    end
end
if i0<2*totnumruns # successful
    numfinished+=1;
    # Save data to a file for checking in MATLAB
    file=matopen("pathway_results_temp.mat","w")
    write(file,"res",res); altered WS production
    write(file,"yorig",yorig); baseline WS production
    close(file);
end
end

# Save data to a file for processing in MATLAB
file=matopen("pathway_results_complete_WSP.mat","w")
file=matopen("pathway_results_complete_AWS.mat","w")
file=matopen("pathway_results_complete_MWS.mat","w")
write(file,"res",res); altered WS production
write(file,"yorig",yorig); baseline WS production
close(file);

```

## MATLAB code for interpreting saved data WSP vs MWS

This code shows how the data from the julia code is analyzed and transformed into the contour plots shown in the paper.

```

% create record of how parameters change down, none, up for WSP
rs1=rand(1,6);

```

```

totnumruns=3.^length(rs1);
paramsWSP=zeros(totnumruns,length(rs1));
v=zeros(size(rs1));
i0=1;
while i0<=totnumruns;
    num=i0-1;
    for il=length(rs1)-1:-1:0;
        v(il+1)=floor(num/(3^il));
        num=num-v(il+1)*3^il;
    end
    v=v+1;
    paramsWSP(i0,:)=v;
    i0=i0+1;
end
% create record of how parameters change down, none, up for MWS
rs1=rand(1,3);
totnumruns=3.^length(rs1);
paramsMWS=zeros(totnumruns,length(rs1));
v=zeros(size(rs1));
i0=1;
while i0<=totnumruns;
    num=i0-1;
    for il=length(rs1)-1:-1:0;
        v(il+1)=floor(num/(3^il));
        num=num-v(il+1)*3^il;
    end
    v=v+1;
    paramsMWS(i0,:)=v;
    i0=i0+1;
end

% Load data
load pathway_results_complete_MWS.mat
resMWS=res;
yorigMWS=yorig';
clear res yorig
load pathway_results_complete_WSP.mat
resWSP=res;
yorigWSP=yorig';

% Variables and data storage to compare likelihood of pathways
numsampWSP=size(resWSP,2); % in case want to use fewer samples
numsampMWS=size(resMWS,2); % in case want to use fewer samples

perange=10.^[-7:.5:-1]; % range for probability enabling mutations
pdrange=10.^[-7:.5:-1]; % range for probability disabling mutations
pemat=zeros(length(perange),length(pdrange)); % matrix for plotting data and reference
pdmat=zeros(size(pemat)); % matrix for plotting data and reference
psummatWSP=zeros(size(pemat)); % matrix for probability WSP used
psummatMWS=zeros(size(pemat)); % matrix for probability MWS used
tol=0;
% Code to compare likelihood of pathways
for i0=1:length(perange)
    for j0=1:length(pdrange)
        % Retrieve probabilities
        pe=perange(i0);
        pd=pdrange(j0);
        pemat(i0,j0)=pe;
    end
end

```

```

pdmatrix(i0,j0)=pd;
% WSP computation
pmatforr=ones(6,1)*[pd 1-pe-pd pe];
psum=0; % total sum of (prob of rxn changes) X (number of times WS produced)
for i1=1:size(resWSP,1)
    probevent=1; % initialize, probability to get combination of down, none, up for rxns
    for j1=1:6;
        probevent=probevent*pmatforr(j1,paramsWSP(i1,j1)); % multiply by prob of each change
    end
    psum=psum+probevent*sum(resWSP(i1,1:numsampWSP)>yorigWSP(1:numsampWSP)+tol)/numsampWSP;
end
psummatWSP(i0,j0)=psum;

% MWS computation
pmatforr=ones(3,1)*[pd 1-pe-pd pe];
psum=0; % total sum of (prob of rxn changes) X (number of times WS produced)
for i1=1:size(resMWS,1)
    probevent=1; % initialize, probability to get combination of down, none, up for rxns
    for j1=1:3;
        probevent=probevent*pmatforr(j1,paramsMWS(i1,j1)); % multiply by prob of each change
    end
    psum=psum+probevent*sum(resMWS(i1,1:numsampMWS)>yorigMWS(1:numsampMWS)+tol)/numsampMWS;
end
psummatMWS(i0,j0)=psum;
end
end

% Plot data
close all
figure
contourf(pemat,pdmatrix,log2(psummatWSP./psummatMWS),400,'LineStyle','None')
set(gca,'xScale','log','yScale','log','TickLength',[.025 .025],'LineWidth',3);
set(gca,'FontSize',18,'xTick',10.^[-7:1:-1],'yTick',10.^[-7:1:-1]);
xlabel('Probability of enabling change','FontSize',24);
ylabel('Probability of disabling change','FontSize',24);
c=colorbar('FontSize',18);
c.Label.String='log2 ratio probability WSP/MWS';
colormap jet;
axis square
eval(['print -fl -depsc -r300 WSP.vs.MWS.contour.eps']);

```

## MATLAB code for interpreting saved data WSP vs AWS

```

% create record of how parameters change down, none, up for WSP
rs1=rand(1,6);
totnumruns=3.^length(rs1);
paramsWSP=zeros(totnumruns,length(rs1));
v=zeros(size(rs1));
i0=1;
while i0<=totnumruns;
    num=i0-1;
    for i1=length(rs1)-1:-1:0;
        v(i1+1)=floor(num/(3^i1));
    end
    i0=i0+1;
end

```

```

        num=num-v(i1+1)*3^i1;
    end
    v=v+1;
    paramsWSP(i0,:)=v;
    i0=i0+1;
end
% create record of how parameters change down, none, up for AWS
rs1=rand(1,4);
totnumruns=3.^length(rs1);
paramsAWS=zeros(totnumruns,length(rs1));
v=zeros(size(rs1));
i0=1;
while i0<=totnumruns;
    num=i0-1;
    for i1=length(rs1)-1:-1:0;
        v(i1+1)=floor(num/(3^i1));
        num=num-v(i1+1)*3^i1;
    end
    v=v+1;
    paramsAWS(i0,:)=v;
    i0=i0+1;
end

% Load data
load pathway_results_complete_AWS.mat
resAWS=res;
yorigAWS=yorig';
clear res yorig
load pathway_results_complete_WSP.mat
resWSP=res;
yorigWSP=yorig';

% Variables and data storage to compare likelihood of pathways
numsampWSP=size(resWSP,2); % in case want to use fewer samples
numsampAWS=size(resAWS,2); % in case want to use fewer samples

perange=10.^[-7:.5:-1]; % range for probability enabling mutations
pdrange=10.^[-7:.5:-1]; % range for probability disabling mutations
pemat=zeros(length(perange),length(pdrange)); % matrix for plotting data and reference
pdmat=zeros(size(pemat)); % matrix for plotting data and reference
psummatWSP=zeros(size(pemat)); % matrix for probability WSP used
psummatAWS=zeros(size(pemat)); % matrix for probability MWS used
tol=0;
fac=5; % factor increase of mutation because of hotspot

% Code to compare likelihood of pathways
for i0=1:length(perange)
    for j0=1:length(pdrange)
        % Retrieve probabilities
        pe=perange(i0);
        pd=pdrange(j0);
        pemat(i0,j0)=pe;
        pdmat(i0,j0)=pd;
        % WSP computation
        pmatfor=ones(6,1)*[pd 1-pe-pd pe];
        psum=0; % total sum of (prob of rxn changes) X (number of times WS produced)
        for i1=1:size(resWSP,1)
            probevent=1; % initialize, probability to get combination of down, none, up for rxns

```

```

        for j1=1:6;
            probevent=probevent*pmatforn(j1,paramsWSP(i1,j1)); % multiply by prob of each change
        end
        psum=psum+probevent*sum(resWSP(i1,1:numsampWSP)>yorigWSP(1:numsampWSP)+tol)/numsampWSP;
    end
    psummatWSP(i0,j0)=psum;

    % AWS computation
    pmatforn=ones(4,1)*[pd 1-pe-pd pe];
    pmatforn(4,:)=[.5*pd 1-.5*pd-.5*pe .5*pe]; % because only reactant in dimerization
    pmatforn(3,:)=[fac*pd 1-fac*pd-fac*pe fac*pe]; % effect of hotspot
    pmatforn(2,:)=[fac*pd 1-fac*pd-fac*pe fac*pe]; % effect of hotspot
    psum=0; % total sum of (prob of rxn changes) X (number of times WS produced)
    for i1=1:size(resAWS,1)
        probevent=1; % initialize, probability to get combination of down, none, up for rxns
        for j1=1:4;
            probevent=probevent*pmatforn(j1,paramsAWS(i1,j1)); % multiply by prob of each change
        end
        psum=psum+probevent*sum(resAWS(i1,1:numsampAWS)>yorigAWS(1:numsampAWS)+tol)/numsampAWS;
    end
    psummatAWS(i0,j0)=psum;
end

end

% Plot data
close all
figure
contourf(pemat,pdmat,log2(psummatWSP./psummatAWS),400,'LineStyle','None')
set(gca,'xScale','log','yScale','log','TickLength',[.025 .025],'LineWidth',3);
set(gca,'FontSize',18,'xTick',10.^[-7:1:-1],'yTick',10.^[-7:1:-1]);
xlabel('Probability of enabling change','FontSize',24);
ylabel('Probability of disabling change','FontSize',24);
c=colorbar('FontSize',18);
c.Label.String='log_2 ratio probability WSP/AWS';
colormap jet;
axis square
eval(['print -fl -depsec -r300 WSP-vs-AWS-contour.eps']);

```
